# Supplementary material for: Transforming growth factor β1-mediated functional inhibition of mesenchymal stromal cells in myelodysplastic syndromes and acute myeloid leukemia
Source: PubMed Central journal article supplement — Haematologica. 2018 May 17;103(9):1462–71. doi: 10.3324/haematol.2017.186734 (PMC6119130; doi:10.3324/haematol.2017.186734), 2018-09
Supplement: 2017.186734.GEYH_SUPPL.pdf [file 2017.186734.GEYH_SUPPL.pdf]

# Transforming growth factor $\beta$ 1-mediated functional inhibition of mesenchymal stromal cells in myelodysplastic syndromes and acute myeloid leukemia

Stefanie Geyh,<sup>1\*</sup> Manuel Rodríguez-Paredes,<sup>1,2\*</sup> Paul Jäger,<sup>1</sup> Annemarie Koch,<sup>1</sup> Felix Bormann,<sup>2</sup> Julian Gutekunst,<sup>2</sup> Christoph Zilkens,<sup>3</sup> Ulrich Germing,<sup>1</sup> Guido Kobbe,<sup>1</sup> Frank Lyko,<sup>2</sup> Rainer Haas<sup>1</sup> and Thomas Schroeder<sup>1</sup>

<sup>1</sup>Department of Hematology, Oncology and Clinical Immunology, University of Duesseldorf, Medical Faculty; <sup>2</sup>Division of Epigenetics, DKFZ-ZMBH Alliance, German Cancer Research Center, Heidelberg and <sup>3</sup>Department of Orthopedic Surgery, University of Duesseldorf, Medical Faculty, Germany

*\*SG and MR-P contributed equally to this work.*

©2018 Ferrata Storti Foundation. This is an open-access paper. doi:10.3324/haematol.2017.186734

Received: December 19, 2017.

Accepted: May 14, 2018.

Pre-published: May 17, 2018.

Correspondence: thomas.schroeder@med.uni-duesseldorf.de

---

Figure S1

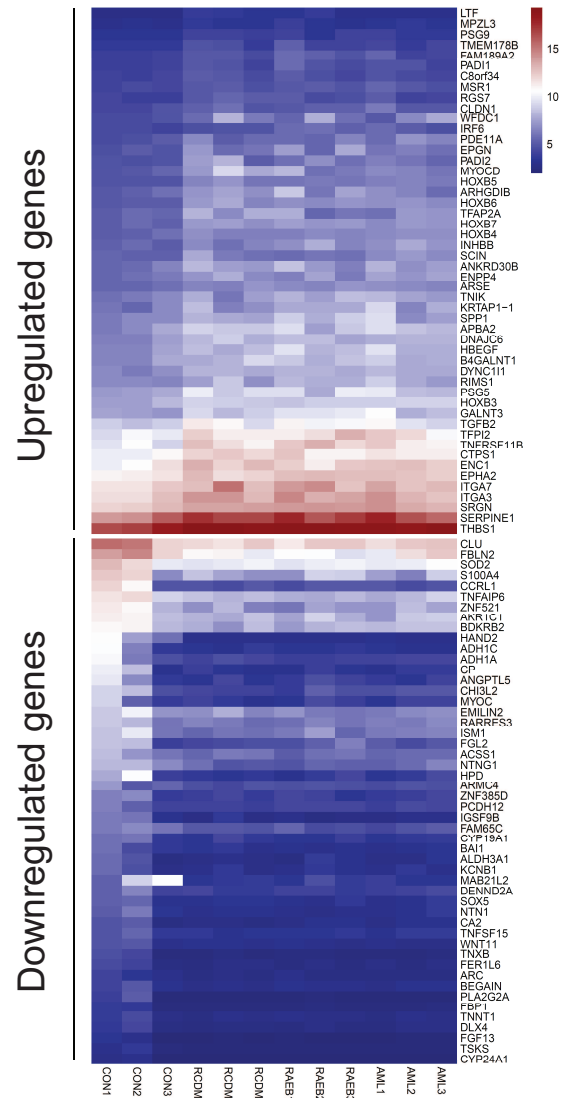

Figure S1. Heatmaps showing the 50 most upregulated and downregulated genes between the 3 healthy MSC controls and the 9 RCMD-, RAEB- and AML-derived MSC samples. Color scale depicts the log-transformed FPKM values for each gene and every sample.

**Figure S2**

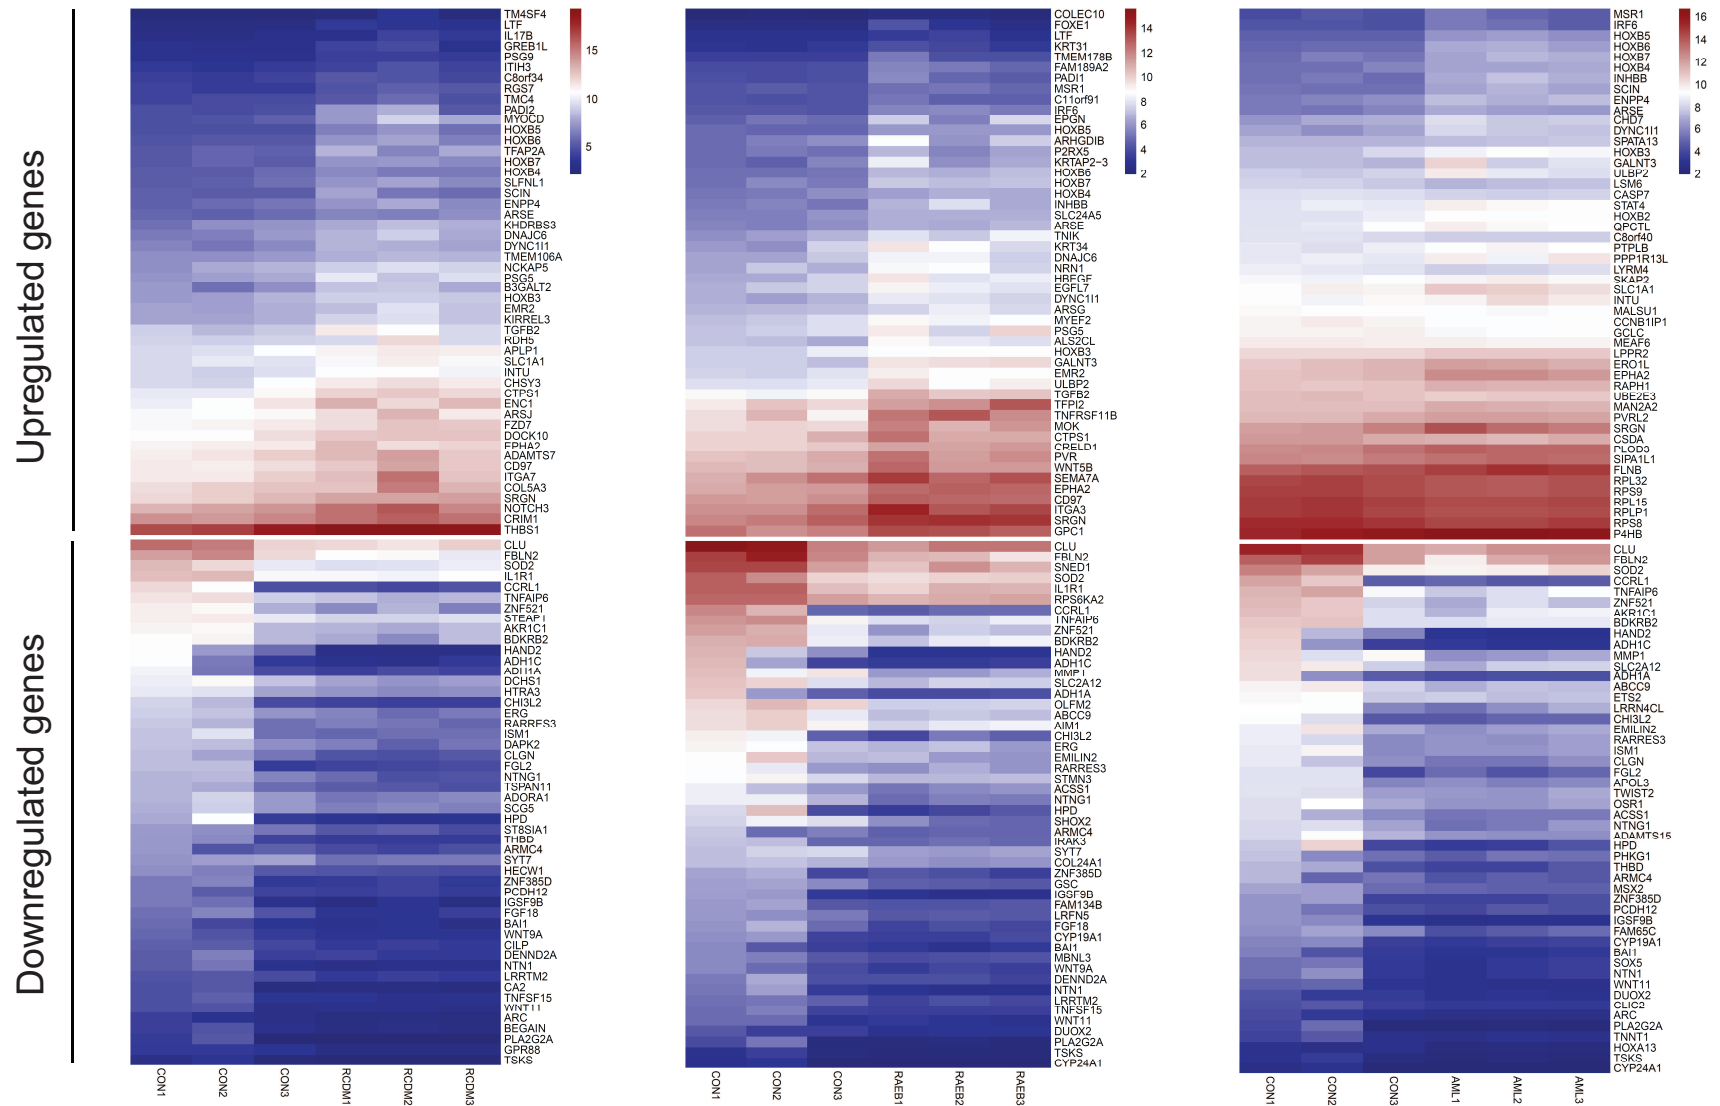

**Figure S2.** Heatmaps showing the 50 most upregulated and downregulated genes between the 3 healthy MSC controls and the 3 RCMD, RAEB and AML MSC samples, respectively. Color scales depict the rlog-transformed FPKM values for each gene and every sample.

# Figure S3

**A.**

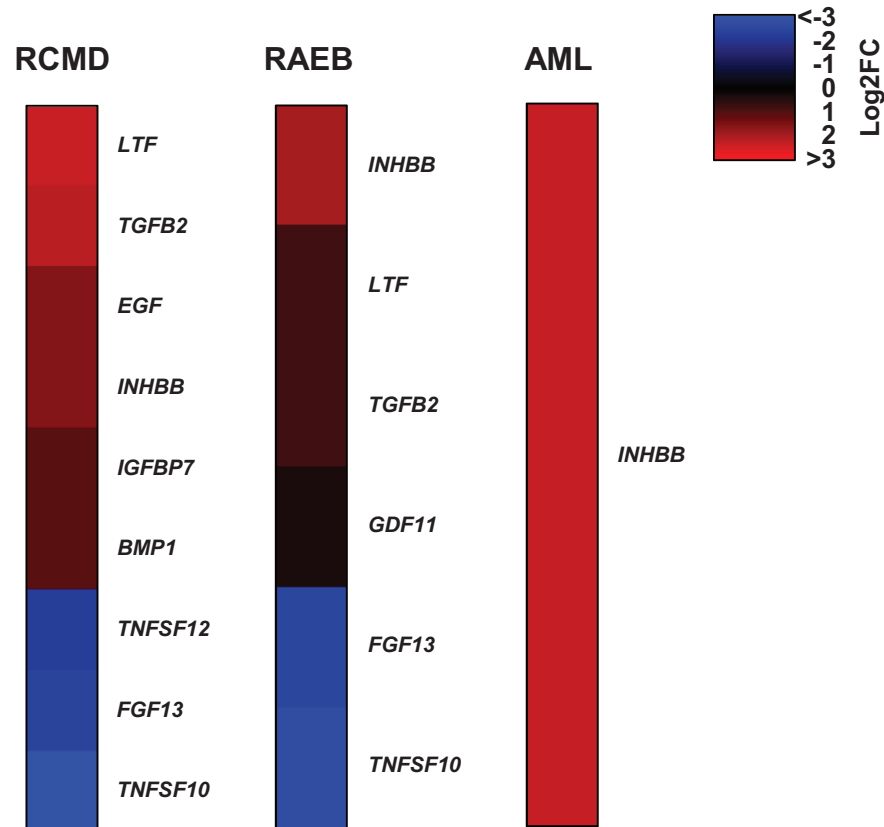

**B.**

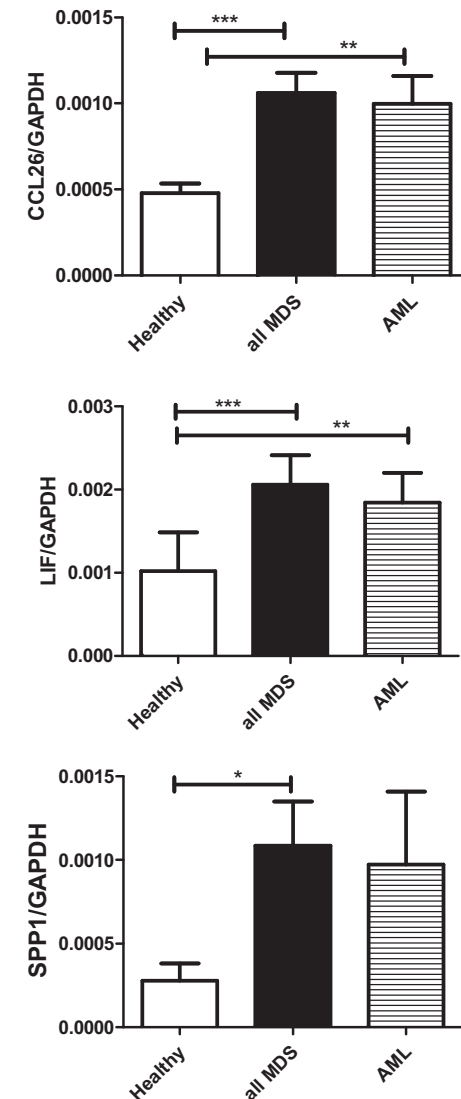

**Figure S3. A.** Heatmap depicting the expression changes of the specific set of cytokines found statistically significantly ( $q < 0.05$ ) deregulated in the MSC from RCMD, RAEB and AML patients. FC: expression fold change. **B.** To validate the results obtained by RNA seq gene expression of 3 candidate cytokines was analyzed by qPCR in an independent set of patient-derived MSC (MDS  $n=32$ ; AML  $n=10$ ) in comparison to MSC of healthy controls ( $n=25$ ). As shown in the figure, the results from this analysis confirmed the results obtained by RNA seq. Asterisks display p-values \*  $p < 0.5$ , \*\*  $p < 0.01$ , \*\*\*  $p < 0.001$ .

**Figure S4**

| RCMD - Predicted Secreted Upstream Regulators |                                |                 |
|-----------------------------------------------|--------------------------------|-----------------|
| Upstream Regulator                            | Molecule Type                  | <i>p</i> -value |
| Dihydrotestosterone                           | Chemical- endogenous mammalian | 2,87E-09        |
| IFN $\gamma$                                  | Cytokine                       | 1,26E-08        |
| TNF $\alpha$                                  | Cytokine                       | 2,76E-08        |
| IL3                                           | Cytokine                       | 8,56E-08        |
| TGF $\beta$ 1                                 | Growth factor                  | 5,36E-07        |

  

| RAEB – Predicted Secreted Upstream Regulators |                                |                 |
|-----------------------------------------------|--------------------------------|-----------------|
| Upstream Regulator                            | Molecule Type                  | <i>p</i> -value |
| UDP-D-Glucose                                 | Cytokine                       | 4,16E-09        |
| Beta-estradiol                                | Chemical- endogenous mammalian | 1,86E-07        |
| TNF $\alpha$                                  | Cytokine                       | 4,01E-06        |
| IFN $\gamma$                                  | Cytokine                       | 2,19E-05        |
| L-methionine                                  | Chemical- endogenous mammalian | 3,00E-05        |

  

| AML - Predicted Secreted Upstream Regulators |                                |                 |
|----------------------------------------------|--------------------------------|-----------------|
| Upstream Regulator                           | Molecule Type                  | <i>p</i> -value |
| IFN $\gamma$                                 | Cytokine                       | 8,23E-06        |
| TNF $\alpha$                                 | Cytokine                       | 2,26E-05        |
| L-methionine                                 | Chemical- endogenous mammalian | 2,72E-05        |
| TGF $\beta$ 1                                | Growth factor                  | 4,89E-05        |
| AGT                                          | Growth factor                  | 6,69E-05        |

**Figure S4.** Ingenuity Pathway Analyses (IPA) of the specific sets of genes found deregulated in each one of the three myeloid subentities. Only the first five predicted secreted upstream regulators are shown for each malignancy. In the case of RAEB, TGF $\beta$ 1 appears in the 7th position with a statistically significant *p*-value of 1.19E-04.

**Figure S5**

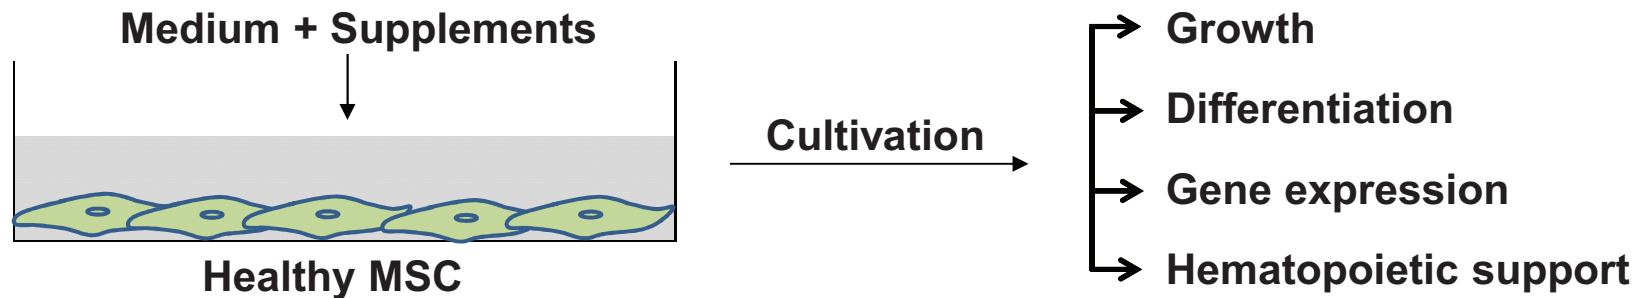

**Figure S5.** Schematic of the cell culture experiments. Healthy were cultured in the presence of TGF $\beta$ 1 and/or TGF $\beta$ R1 kinase inhibitor SD-208. After this pre-incubation MSC were then analysed with regard to their growth and differentiation potential as well as gene expression and hematopoietic support capacities. The concentrations of TGF $\beta$ 1 and SD-208 are given in the Methods section and are accordance with previous reports (21-23).

Figure S6

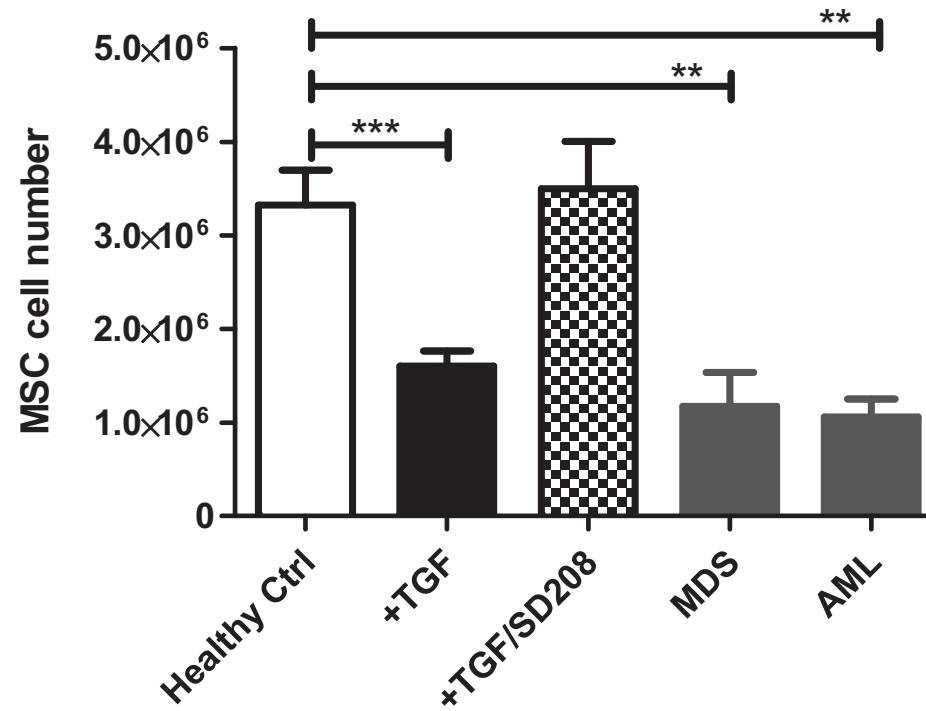

**Figure S6.** Bar charts show the absolute MSC numbers after 3 days pre-incubation of  $2 \times 10^5$  healthy MSC with TGF $\beta$ 1 (10 ng/ml) in comparison to untreated primary MDS- and AML-derived MSC. Asterisks display p-values, \*\*  $p < 0.01$ , \*\*\*  $p < 0.001$ .

## Figure S7

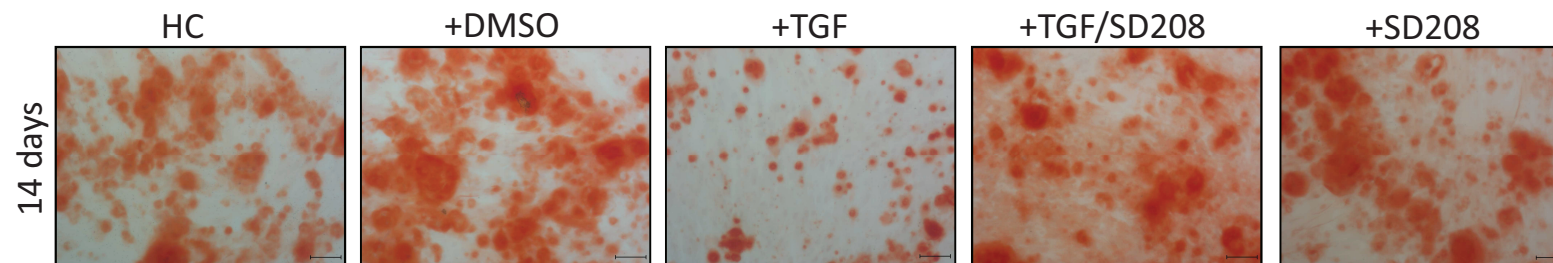

**Figure S7.** Healthy MSC were treated for the respective factors for 14 days. Afterwards osteogenic differentiation was visualized by Alizarin Red staining. Representative micrographs with scale bars indicating 100 $\mu$ m.



**Figure S8**

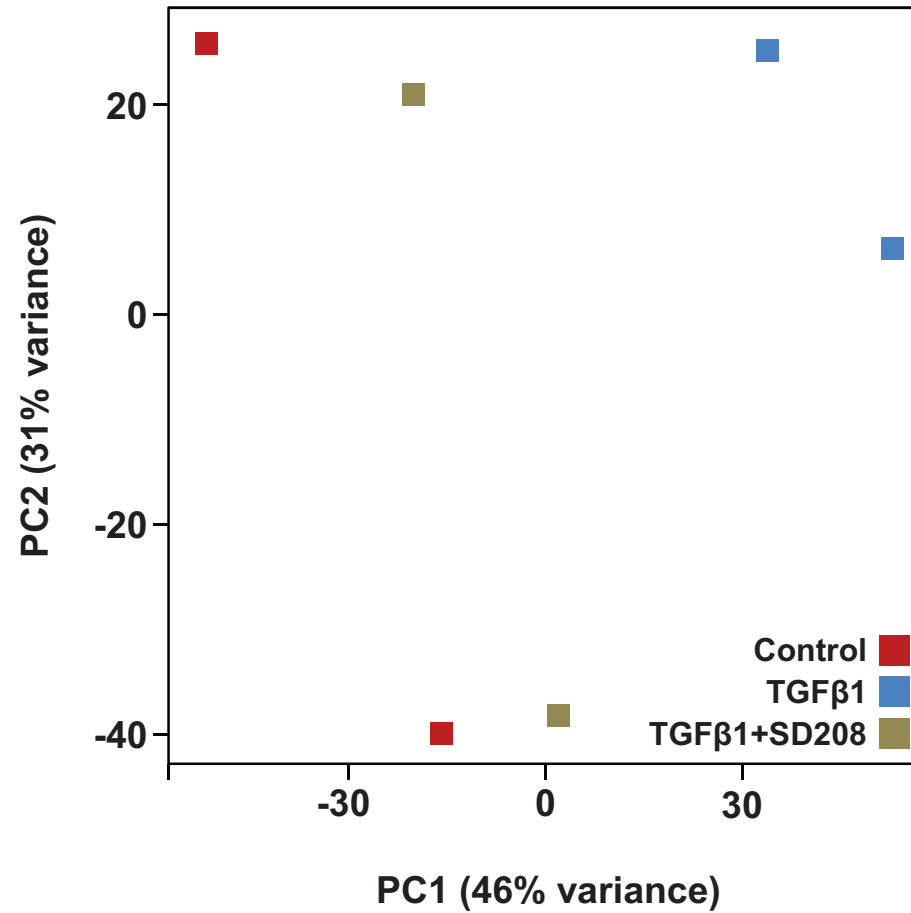

**Figure S8.** Principal component analysis performed with RNA-seq data from healthy MSC treated for 28 days with DMSO (control), TGFβ1 or TGFβ1 with SD-208. Gene expression data clearly separates the samples along PC1 (the treatments) and PC2 (the two biological replicates).

Figure S9

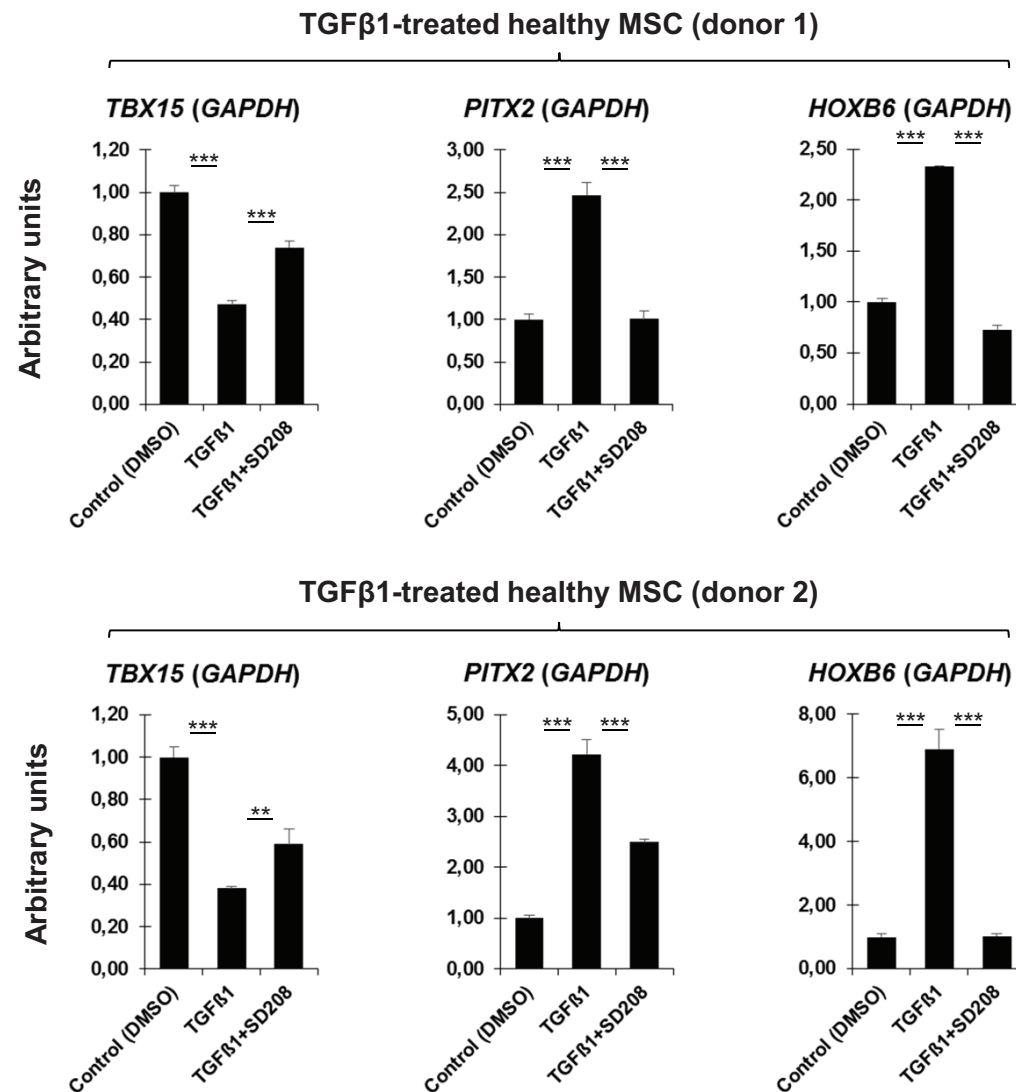

**Figure S9.** Healthy MSC (n=2 donors) were pre-incubated with TGFβ1 and/or SD-208 for up to 28 days. Medium was changed every 3 days supplemented with DMSO, TGFβ1 or TGFβ1 with SD-208 at a concentration ranging from 5ng/ml to 10ng/ml. Subsequently, qRT-PCR experiments were performed to assess the expression of *TBX15*, *PITX2* and *HOXB6*. Statistical significance was determined with the Student's t-test (\*\*  $p < 0.01$ , \*\*\*  $p < 0.001$ ).

**Figure S10**

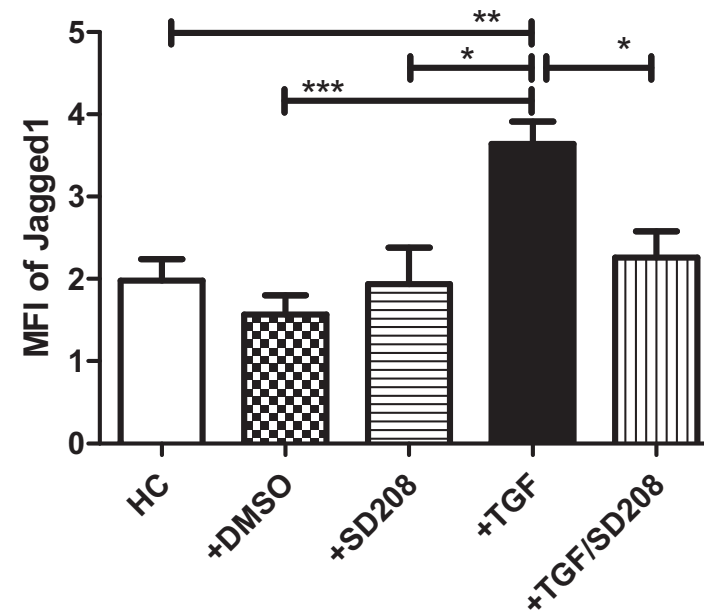

**Figure S10.** To test a potential of SD-208 alone to induce the expression of Jagged1, healthy MSC were incubated with SD-208 (n=3). Bar charts illustrate that SD-208 did not influence the protein expression of Jagged1 after 7 days as measured by flow cytometry. Asterisks display p-values \*  $p < 0.05$ , \*\*  $p < 0.01$ .

## Figure S11

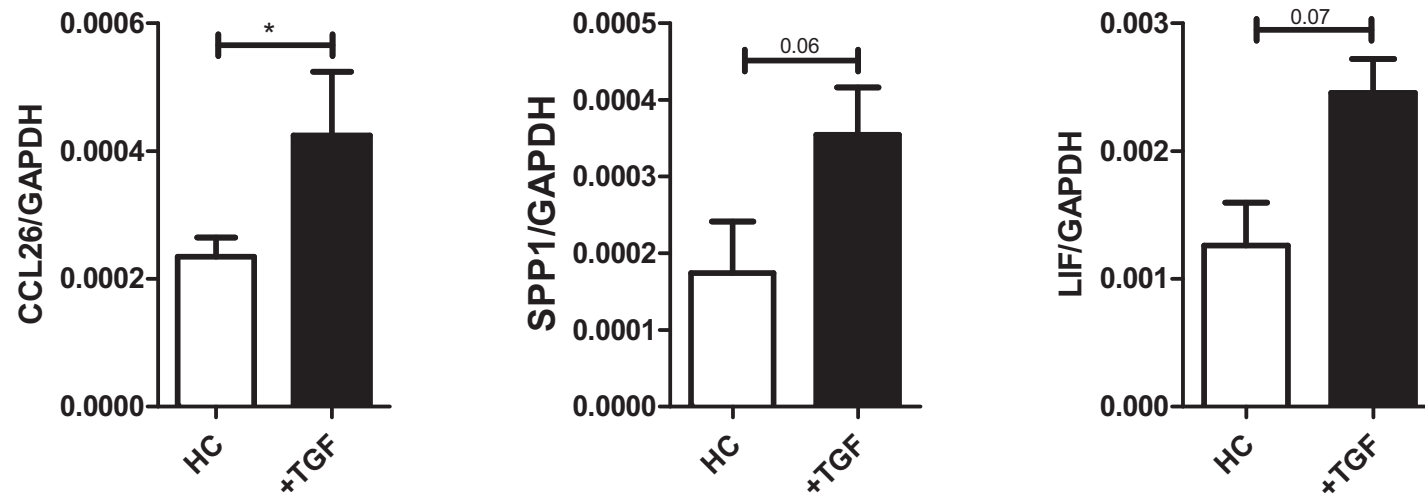

**Figure S11.** To test whether TGF $\beta$ 1 influences the expression of 3 candidate cytokines in the same direction as detected in the primary patient-derived MSC we measured their gene expression using quantitative PCR prior (n=6) and after 14d of treatment with TGF $\beta$ 1 (n=6). As shown in the figure, the results from this analysis confirmed the results obtained by RNA seq. Asterisks display p-values \*  $p < 0.05$ .

**Figure S12**

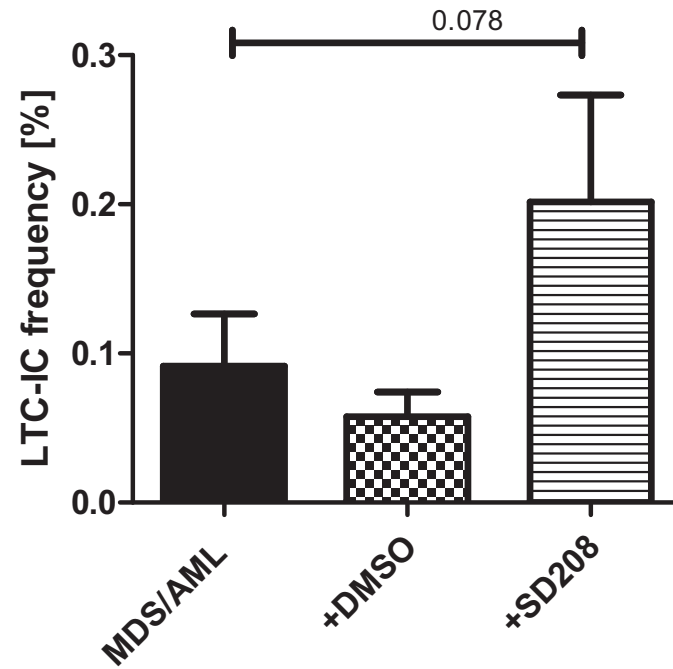

**Figure S12.** Bar charts show LTC-IC frequencies of healthy CD34+ HSPC cultured on MDS- and AML-derived MSC (n=6) either native or pre-incubated with SD-208.

**Figure S13**

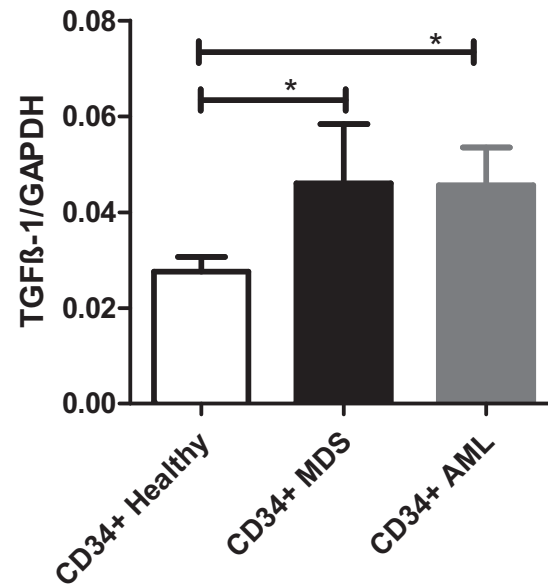

**Figure S13.** RNA expression of TGFβ1 was analyzed in CD34+ HSPC cells from patients with MDS (n=7) and AML (n=13) in comparison to healthy controls (n=20). Sequences of the primers can be provided on request.

**Figure S14**

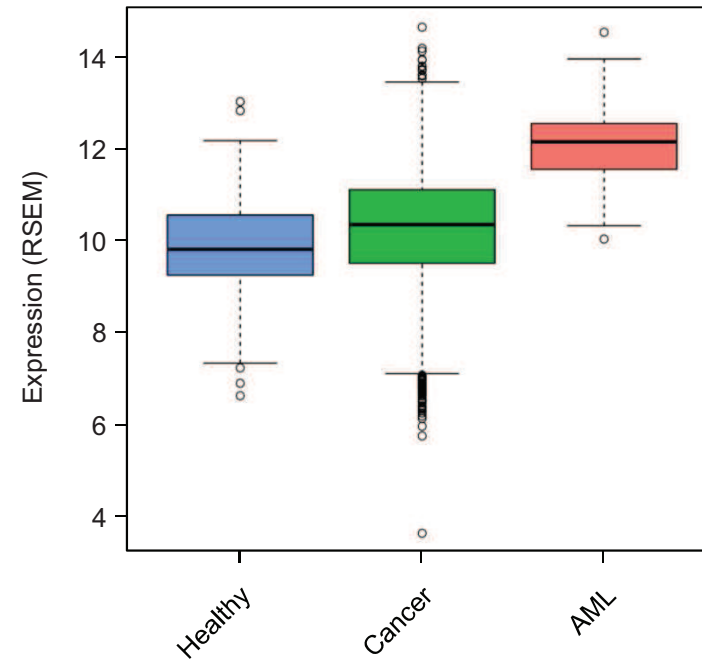

**Figure S14.** Box plot showing TGFβ1 expression (RNAseq) in 28 different healthy tissues (967 samples), 36 different tumor entities (12,974 samples) and 173 AML samples from TCGA database. Highest  $p$ -value between comparisons ( $t$ -test):  $6,179E-31$ .

**Table S1. Patients Demographics.**

| <b>MDS</b>     |            |               |                                         |                |                                              |                                                       |
|----------------|------------|---------------|-----------------------------------------|----------------|----------------------------------------------|-------------------------------------------------------|
| <b>Patient</b> | <b>Age</b> | <b>Gender</b> | <b>WHO 2008/2016</b>                    | <b>IPSS</b>    | <b>IPSS-R</b>                                | <b>Karyotype</b>                                      |
| MDS1           | 61         | female        | RARS/MDS-RS-SLD                         | low            | low                                          | Normal                                                |
| MDS2           | 60         | male          | RCMD/MDS-MLD                            | low            | low                                          | Normal                                                |
| MDS3           | 58         | male          | RCMD/MDS-MLD                            | intermediate-1 | low                                          | Normal                                                |
| MDS4           | 89         | male          | RCMD/MDS-MLD                            | Intermediate-1 | intermediate                                 | Trisomy 8                                             |
| MDS5           | 65         | male          | RCMD-RS/MDS-RS-MLD                      | low            | low                                          | Normal                                                |
| MDS6           | 47         | male          | RCMD/MDS-MLD                            | intermediate-2 | intermediate                                 | 46,XY<br>+1.der(1;7)(q10;p10)[13];46,XY[7]            |
| MDS7           | 64         | male          | RAEB I/MDS-EB-I                         | intermediate-2 | high                                         | Complex                                               |
| MDS8           | 74         | male          | RAEB II/MDS-EB-II                       | intermediate-1 | intermediate                                 | Normal                                                |
| MDS9           | 72         | male          | RAEB II/MDS-EB-II                       | intermediate-2 | high                                         | 5q-, t(11;12)                                         |
| MDS10          | 80         | male          | RAEB II/MDS-EB-II                       | Missing        | missing                                      | Missing                                               |
| MDS11          | 57         | male          | RAEB I/MDS-EB-I                         | intermediate-2 | high                                         | 46,XY[27], FISH: -7, +17                              |
| MDS12          | 46         | male          | RCMD/MDS-MLD                            | low            | low                                          | 46,XY[22]                                             |
| MDS13          | 39         | male          | RAEB II/MDS-EB-II                       | intermediate-1 | intermediate                                 | +8, XXY, add(21p)                                     |
| <b>AML</b>     |            |               |                                         |                |                                              |                                                       |
| <b>Patient</b> | <b>Age</b> | <b>Gender</b> | <b>WHO 2008/2016</b>                    | <b>FAB</b>     | <b>Genetic Aberrations</b>                   | <b>Karyotype</b>                                      |
| AML1           | 49         | male          | AML with myelodysplasia related changes | M4             | no mutations                                 | Normal                                                |
| AML2           | 54         | male          | AML with myelodysplasia related changes | M1             | no mutations                                 | Complex                                               |
| AML3           | 67         | male          | AML therapy-related                     | M4             | not tested                                   | 46 XY, t(14;16)[21]/ 46 XY [6]                        |
| AML4           | 34         | female        | AML NOS                                 | M0/1           | FLT3-ITD                                     | Normal                                                |
| AML5           | 67         | male          | AML NOS                                 | M5             | FLT3-ITD                                     | 46, XY,<br>del(20)(q11.2q13.1)(17)/47,idem,<br>+21(4) |
| AML6           | 48         | male          | AML with recurrent genetic changes      | M4             | FLT3-ITD , NPM-1                             | Normal                                                |
| AML7           | 55         | male          | AML with myelodysplasia related changes | M0             | no mutations                                 | Complex                                               |
| AML8           | 71         | male          | AML with myelodysplasia related changes | M5b            | no mutations                                 | Complex                                               |
| AML9           | 49         | male          | AML NOS                                 | M4             | not tested                                   | not tested                                            |
| AML10          | 25         | male          | AML with recurrent genetic changes      | M2/4           | FLT3-ITD                                     | t(6;9)                                                |
| AML11          | 60         | male          | AML with myelodysplasia related changes | M1             | no mutations                                 | 46,XY, +1,<br>der(1;7)(q10;q10)[3]/46,XY[27]          |
| AML12          | 55         | male          | AML with myelodysplasia related changes | M1             | RUNX1                                        | 46,XY[24]                                             |
| AML13          | 62         | female        | AML with myelodysplasia related changes | M2             | no mutations                                 | complex                                               |
| AML14          | 62         | female        | AML with myelodysplasia related changes | M1             | IDH2-Mutation, no other mutations            | t(3;21)                                               |
| AML15          | 57         | male          | AML with recurrent genetic changes      | M1             | FLT3-TKD , NPM-1,<br>SF3B1+, NRAS+,<br>TET2+ | 46,XY [22]                                            |

**Table S1.** Individual patients' characteristics are given for AML and MDS patients separately. WHO classification version 2008 and 2016 are given.

In MDS patients included in this study mutation testing was not routinely performed. Only in patient MDS1 a SF3B1 mutation is known. In AML patients a targeted gene panel of 7 genes was routinely performed in all but one patients. Information of detected mutations is thus given for AML patients.



EB: excess blasts; MLD: multilineage dysplasia; NOS: not otherwise specified; RS: ringsideroblasts; SLD: single lineage dysplasia

**Table S2: Antibody specifications**

| <b>Name</b>      | <b>Host</b> | <b>Specificity</b> | <b>Type</b>      | <b>Clone</b> | <b>Labeling</b>     |
|------------------|-------------|--------------------|------------------|--------------|---------------------|
| Isotype          | mouse       | human              | IgG <sub>1</sub> | X40          | FITC/PE (Simultest) |
| Isotype          | mouse       | human              | IgG <sub>1</sub> | MOPC-21      | PerCP-Cy5.5         |
| Isotype          | mouse       | human              | IgG <sub>1</sub> | MOPC-21      | APC                 |
| CD34             | mouse       | human              | IgG <sub>1</sub> | 8G12         | APC                 |
| CD45             | mouse       | human              | IgG <sub>1</sub> | HI30         | FITC, PE            |
| CD73             | mouse       | human              | IgG <sub>1</sub> | AD2          | PE                  |
| CD90             | mouse       | human              | IgG <sub>1</sub> | 5E10         | APC                 |
| CD105 (Endoglin) | mouse       | human              | IgG <sub>1</sub> | 266          | PerCP-Cy5.5         |
| CD339 (Jagged1)  | mouse       | human              | IgG <sub>1</sub> | J1G53-3      | FITC                |

Table S3

| 3 Healthy vs. 9 M. Malignancies samples (q < 0.05) |             | 3 Healthy vs. 3 RCMC samples (q < 0.05) |             | 3 Healthy vs. 3 RAEB samples (q < 0.05) |             | 3 Healthy vs. 3 AML samples (q < 0.05) |             |             |
|----------------------------------------------------|-------------|-----------------------------------------|-------------|-----------------------------------------|-------------|----------------------------------------|-------------|-------------|
| Gene                                               | Fold change | Gene                                    | Fold change | Gene                                    | Fold change | Gene                                   | Fold change |             |
| HOBX6                                              | 18.25108202 | 4.5727E-23                              | HOBX6       | 12.87708294                             | 6.68448E-18 | HOBX6                                  | 9.338728382 | 2.52157E-13 |
| HOBX5                                              | 11.76009639 | 2.27381E-15                             | HOBX5       | 9.813545169                             | 4.9584E-14  | HOBX5                                  | 7.450284781 | 2.53923E-10 |
| HOBX7                                              | 11.13539595 | 5.59796E-19                             | HOBX7       | 7.142816551                             | 4.13376E-10 | HOBX7                                  | 6.138989374 | 2.81212E-06 |
| INHBB                                              | 5.881232469 | 1.2215E-05                              | PADI2       | 4.568914691                             | 0.000319111 | INHBB                                  | 4.816397718 | 8.38625E-05 |
| TMEM178B                                           | 5.374852288 | 0.00030464                              | DYNC11      | 4.11935516                              | 1.52275E-06 | IRF6                                   | 5.010802658 | 1.92716E-05 |
| GALNT3                                             | 5.199448249 | 0.000109757                             | MYOCD       | 3.980236381                             | 0.001202191 | DYNC11                                 | 3.959294223 | 3.19425E-06 |
| FAM189A2                                           | 5.051413568 | 0.00051411                              | SCN         | 3.694733794                             | 0.00175797  | EPHA2                                  | 3.766723923 | 8.49972E-06 |
| PADI2                                              | 4.846811531 | 0.00084463                              | COR7        | 3.642044167                             | 5.80686E-05 | EPHA2                                  | 3.583465653 | 0.000226288 |
| DYNC11                                             | 4.789702623 | 1.29751E-12                             | ITF         | 3.637923644                             | 0.002925382 | ARSE                                   | 3.561792161 | 8.2523E-05  |
| HOBX4                                              | 4.657975449 | 2.82030E-07                             | SLFN1L      | 3.571701228                             | 0.000292582 | SRGN                                   | 3.535465653 | 0.000226288 |
| EPGN                                               | 4.635087459 | 0.00106672                              | ARSE        | 3.527764671                             | 0.000119377 | GALNT3                                 | 3.52080817  | 0.005068701 |
| TNFRSF11B                                          | 4.432658888 | 0.000849392                             | CTSP1       | 3.513120467                             | 0.001614778 | TNFRSF11B                              | 3.477321713 | 0.005801964 |
| ANKRD30B                                           | 4.361189259 | 0.000849392                             | NOTCH3      | 3.506908017                             | 0.001875221 | ARHGDB                                 | 3.459457691 | 0.005881712 |
| TFPI2                                              | 4.357409752 | 0.00072677                              | CHSY3       | 3.488765797                             | 0.000921785 | TFPI2                                  | 3.392201709 | 0.006629257 |
| PGS5                                               | 4.313962135 | 0.000529335                             | DNAJC6      | 3.402096195                             | 0.002877274 | HOBX4                                  | 3.319863764 | 0.001053132 |
| ARSE                                               | 4.309337897 | 2.84296E-09                             | EMR2        | 3.307400778                             | 0.000714475 | NCK                                    | 3.261059061 | 0.006134997 |
| PSG9                                               | 4.201130377 | 0.00238742                              | ITH3        | 3.290574496                             | 0.006108054 | PADI1                                  | 3.235591233 | 0.010716531 |
| IRF6                                               | 4.173500129 | 0.000926459                             | HOBX4       | 3.289398888                             | 0.001122748 | FAM189A2                               | 3.203854166 | 0.010486407 |
| TFAP2A                                             | 4.147344359 | 0.002528644                             | RGS7        | 3.213097625                             | 0.009055064 | PRX5                                   | 3.062706998 | 0.012586148 |
| MSR1                                               | 4.097296542 | 0.000399827                             | TGFBI2      | 3.193146358                             | 0.008189663 | NRN1                                   | 3.036505131 | 0.012120328 |
| DNAJC5                                             | 4.07245977  | 0.00177718                              | ENC1        | 3.178014536                             | 0.007078643 | CD57                                   | 3.013919753 | 0.011026568 |
| ENPP4                                              | 3.966060245 | 0.000749346                             | HOBX3       | 3.158721107                             | 0.0015929   | KRTAP2-3                               | 2.921055276 | 0.01623902  |
| PDE11A                                             | 3.940508674 | 0.00376701                              | ITGA7       | 3.137225943                             | 0.010517536 | COLEC10                                | 2.89533297  | 0.018639201 |
| SPP1                                               | 3.937445841 | 0.00276446                              | GREB1L      | 3.115610224                             | 0.010281034 | TNKK                                   | 2.866107265 | 0.019606601 |
| MYOCD                                              | 3.890979028 | 0.005890755                             | TFAP2A      | 3.106869292                             | 0.010955694 | TMEM178B                               | 2.8399294   | 0.020040987 |
| RGS7                                               | 3.819662831 | 0.004465894                             | KRRREL3     | 3.101714541                             | 0.002336408 | ULBP2                                  | 2.82625102  | 0.011412039 |
| PADI1                                              | 3.817032266 | 0.002386301                             | INTU        | 3.065539171                             | 5.04363E-05 | EMR2                                   | 2.823873746 | 0.002520285 |
| APBA2                                              | 3.800480006 | 0.00276446                              | ENPP4       | 2.962097886                             | 0.01359375  | SLC2A5                                 | 2.810249566 | 0.012799899 |
| TGFBI2                                             | 3.781833596 | 0.001511574                             | PGS5        | 2.957928622                             | 0.01530444  | MYE2F                                  | 2.808385814 | 0.009548491 |
| HBEF                                               | 3.759593189 | 0.002898611                             | APL1        | 2.928017444                             | 0.003929881 | ALS2CL                                 | 2.798385874 | 0.019598339 |
| RMS1                                               | 3.72674515  | 0.001083799                             | COL5A3      | 2.917723736                             | 0.01706429  | DNAJC6                                 | 2.794899066 | 0.016591426 |
| LTF                                                | 3.721223862 | 0.007978847                             | THSD1       | 2.910569094                             | 0.005308788 | KRT34                                  | 2.770783144 | 0.024631996 |
| ARHGDB                                             | 3.709560546 | 0.00576826                              | DOCK10      | 2.86480332                              | 0.005860663 | ITGA3                                  | 2.754739188 | 0.022840748 |
| SERPINE1                                           | 3.681135875 | 0.004095372                             | IL17B       | 2.858069896                             | 0.021158122 | MSR1                                   | 2.752789525 | 0.021441519 |
| SCN                                                | 3.677311323 | 0.00348764                              | FZD7        | 2.856263054                             | 0.002841597 | LTF                                    | 2.751202722 | 0.025208436 |
| ITGA3                                              | 3.660349482 | 0.001348896                             | NCKAP5      | 2.853566823                             | 0.013064593 | ARSG                                   | 2.747055234 | 0.000851746 |
| ITGA7                                              | 3.601617595 | 0.006303447                             | TMEM106A    | 2.853206934                             | 0.000169395 | GPC1                                   | 2.743686969 | 0.000411565 |
| EPHA2                                              | 3.598016164 | 5.50862E-07                             | ARSL        | 2.84127857                              | 0.017940741 | WNT5B                                  | 2.731782511 | 0.016139733 |
| KRTAP1-1                                           | 3.584405037 | 0.007104025                             | BGAL2T      | 2.816854807                             | 0.021291411 | CREL1D                                 | 2.728035595 | 0.005262085 |
| SRGN                                               | 3.584207222 | 6.8963E-06                              | ADAMT5      | 2.801532122                             | 0.008856572 | PVR                                    | 2.71819146  | 0.015259792 |
| MPZL3                                              | 3.575093719 | 0.003740474                             | Cbr54       | 2.794849929                             | 0.023459094 | HOBX3                                  | 2.716711398 | 0.00170235  |
| HOBX3                                              | 3.540773286 | 9.25893E-08                             | PSG9        | 2.782650261                             | 0.024515521 | C11orf81                               | 2.712587596 | 0.021389437 |
| CLDN1                                              | 3.525167355 | 0.005413376                             | SRGN        | 2.76381861                              | 0.004802859 | TGFBI2                                 | 2.702164371 | 0.02581167  |
| Cbr54                                              | 3.463154475 | 0.004528869                             | TMC4        | 2.761359819                             | 0.016800456 | EGF7L                                  | 2.701844818 | 0.012853196 |
| BGALNT1                                            | 3.438489231 | 0.002910503                             | SLC1A1      | 2.753752941                             | 0.001202191 | PGS5                                   | 2.694461134 | 0.028555949 |
| TNKK                                               | 3.397245453 | 0.00535596                              | RHS5        | 2.72845785                              | 0.02793638  | HBEF                                   | 2.694280176 | 0.029176731 |
| THBS1                                              | 3.391674498 | 0.000414519                             | CRIM1       | 2.726736616                             | 0.001612093 | SEMA7A                                 | 2.692821445 | 0.021010117 |
| WDC1                                               | 3.373984919 | 0.016213706                             | TMSF4       | 2.720086474                             | 0.024718418 | KRT31                                  | 2.685293444 | 0.028720516 |
| ENC1                                               | 3.3614057   | 0.003025873                             | EPHA2       | 2.68019334                              | 0.002532927 | FOXE1                                  | 2.679012664 | 0.017957567 |
| CTSP1                                              | 3.301593911 | 0.001934563                             | KHDRBS3     | 2.667591727                             | 0.021291411 | CTSP1                                  | 2.629976029 | 0.021005128 |
| NRN1                                               | 3.289976291 | 0.00376701                              | TRPC4       | 2.661818539                             | 0.028515953 | HSP90B1                                | 2.626155815 | 0.001072006 |
| GRK2                                               | 3.27191617  | 0.014223292                             | STC2        | 2.654573606                             | 0.012635979 | TMEM191C                               | 2.624801302 | 0.031901369 |
| DKK1                                               | 3.269577433 | 0.002351928                             | HGD         | 2.649943702                             | 0.03848471  | MPZL3                                  | 2.623380257 | 0.033787141 |
| SLAMF9                                             | 3.253417163 | 0.017803844                             | LOXL2       | 2.640900992                             | 0.024768326 | THBS1                                  | 2.609957136 | 0.021088225 |
| NOTCH3                                             | 3.220243568 | 0.003004192                             | ARSG        | 2.610843235                             | 0.001361977 | KIRREL3                                | 2.541659734 | 0.016535713 |
| COLEC10                                            | 3.21626531  | 0.019140863                             | FAT3        | 2.610329996                             | 0.038182606 | Cbr54                                  | 2.538605201 | 0.041755618 |
| LPNH3                                              | 3.208998457 | 0.021463022                             | TMEM178B    | 2.606426284                             | 0.036289556 | TMEM106A                               | 2.533481054 | 0.001325047 |
| CD274                                              | 3.18985318  | 0.002045227                             | GRK2        | 2.602915192                             | 0.03857533  | ANKRD30B                               | 2.527876689 | 0.044817429 |
| MHF14                                              | 3.17806807  | 0.02337501                              | ITGA3       | 2.599663996                             | 0.035820193 | BDNF                                   | 2.518886624 | 0.020626709 |
| RORB                                               | 3.170701444 | 0.02337501                              | GFL1D1      | 2.599317735                             | 0.025904984 | SLC17A9                                | 2.515058661 | 0.014071285 |
| NRXN3                                              | 3.169552621 | 0.02377942                              | NFASC       | 2.593086103                             | 0.003787204 | OPCTL                                  | 2.51178765  | 0.000294343 |
| NLRP3                                              | 3.158430085 | 0.017547663                             | PCHDGA8     | 2.590980195                             | 0.012463857 | HEPH1L                                 | 2.511069503 | 0.035041196 |
| NOG                                                | 3.157176947 | 0.019454959                             | ERMN        | 2.575569076                             | 0.0136401   | APL1                                   | 2.491185812 | 0.017548401 |
| ULBP2                                              | 3.139868919 | 0.000892991                             | EGF         | 2.5708237                               | 0.04261409  | RMS1                                   | 2.490143482 | 0.044658449 |
| CD97                                               | 3.13553235  | 0.00401294                              | SEMA7A      | 2.563764742                             | 0.031109778 | AP153                                  | 2.463489891 | 0.030685819 |
| KIRREL3                                            | 3.130050276 | 0.00342197                              | STGALNAC3   | 2.55961893                              | 0.043822812 | RAET1L                                 | 2.480959576 | 0.033071566 |
| LIF                                                | 3.121286922 | 0.010099439                             | LGMN        | 2.556121608                             | 0.01809664  | ACF5                                   | 2.464213752 | 0.018979993 |
| OOEP                                               | 3.10458272  | 0.0204916752                            | DMD         | 2.549606299                             | 0.044633382 | STC2                                   | 2.461076218 | 0.022928637 |
| EMR2                                               | 3.098731901 | 0.00044856                              | COL25A1     | 2.541048123                             | 0.045489664 | DGKI                                   | 2.425047464 | 0.048812626 |
| PCDCLG2                                            | 3.085324755 | 0.007032573                             | NOMD3       | 2.539005803                             | 0.001122748 | MYCT1                                  | 2.416289457 | 0.041347093 |
| LYPD1                                              | 3.076583365 | 0.018462772                             | FAM212B     | 2.534152307                             | 0.030022906 | PHAX2                                  | 2.412786624 | 0.016635969 |



|          |             |              |          |             |             |          |             |             |
|----------|-------------|--------------|----------|-------------|-------------|----------|-------------|-------------|
| HYOU1    | 2.219108601 | 0.008451623  | CCDC80   | 1.809204186 | 0.048325294 | FAM124B  | 1.790540035 | 0.023761553 |
| PCB33    | 2.213320173 | 0.019140863  | XYLT2    | 1.808713862 | 0.028843693 | BKCAL17  | 1.790419324 | 0.021351102 |
| CALD1    | 2.214056121 | 0.04989401   | ZNF625   | 1.807404493 | 0.014640183 | BAK1     | 1.788038476 | 0.012464396 |
| ERMN     | 2.207578801 | 0.040399013  | ATPEVA1  | 1.807315661 | 0.046435314 | TUBB8    | 1.787036415 | 0.030502608 |
| NOX01    | 2.207545882 | 0.043813302  | MFSDD12  | 1.803896545 | 0.028046956 | AP1B1    | 1.786312686 | 0.019933574 |
| LOX      | 2.207100903 | 0.002003673  | MACF1    | 1.796409601 | 0.023398086 | ANXA6    | 1.785998165 | 0.011059088 |
| LFNG     | 2.20664184  | 0.045182243  | CERCAM   | 1.792899506 | 0.049574448 | C11orf24 | 1.785665036 | 0.003840261 |
| PTPLA    | 2.199088535 | 0.00797847   | MAGH1    | 1.792045866 | 0.011552946 | ATAD3A   | 1.778061235 | 0.041466128 |
| ATP13A2  | 2.193575219 | 0.007634199  | ARHGAP31 | 1.789888537 | 0.033166628 | SUSD1    | 1.775673884 | 0.011085098 |
| PCDHGA3  | 2.188896975 | 0.02712287   | SUSD1    | 1.788033996 | 0.008838588 | COMTD1   | 1.768374762 | 0.016734047 |
| FLNB     | 2.182201955 | 0.000107148  | TFEB     | 1.785129384 | 0.014640183 | SMPD1    | 1.758060342 | 0.021093087 |
| RHBDP2   | 2.180980532 | 0.023337501  | MICAL3   | 1.783159523 | 0.011537136 | PRADC1   | 1.758028795 | 0.009804776 |
| CHST11   | 2.178359861 | 0.009051916  | SLC12A4  | 1.779140264 | 0.043103715 | BCAP31   | 1.757684152 | 0.014608076 |
| NEK7     | 2.165063004 | 0.002495757  | ATP6AP1  | 1.777658631 | 0.032854014 | AXL      | 1.755666343 | 0.04337955  |
| SYNGR2   | 2.163943752 | 0.03517381   | PHF17    | 1.776639738 | 0.017030663 | ABC88    | 1.753066669 | 0.009113138 |
| DNAJA4   | 2.1555907   | 0.013684186  | ERO1L    | 1.771799927 | 0.019183373 | MFS02    | 1.747197015 | 0.020886452 |
| TPM2     | 2.154612975 | 0.024928842  | CALU     | 1.771108517 | 0.017049687 | SLC35A2  | 1.745592741 | 0.008997323 |
| CAV2     | 2.15425952  | 0.031187461  | FAM124B  | 1.769681564 | 0.02893692  | CTS2     | 1.740221445 | 0.043418953 |
| FZD7     | 2.153812304 | 0.03397637   | LEPREL2  | 1.768566221 | 0.033894446 | ANO10    | 1.737597687 | 0.038698963 |
| CALR     | 2.150808381 | 0.003727616  | CHPF2    | 1.768495937 | 0.014080554 | CYB5E1D2 | 1.735813215 | 0.029176731 |
| LGMN     | 2.143029248 | 0.042964147  | EXT2     | 1.761128154 | 0.038820193 | MAGED1   | 1.735662402 | 0.002093749 |
| GADD45A  | 2.136938489 | 0.002528644  | LRFRIP1  | 1.753877939 | 0.044720497 | VIMP     | 1.732991545 | 0.03197429  |
| HOXB2    | 2.12636375  | 1.832486E-06 | ANXA6    | 1.747543438 | 0.012623781 | SHRFP1   | 1.732494584 | 0.0426373   |
| NCLN     | 2.119476186 | 0.001790433  | CD151    | 1.744942455 | 0.031264286 | B3GATL6  | 1.726380156 | 0.034862658 |
| IFO2     | 2.119175162 | 0.006303447  | MPP3     | 1.744736766 | 0.034877962 | ATPVOC   | 1.725264939 | 0.011728252 |
| ADAM9    | 2.112415606 | 0.021819477  | PVRL2    | 1.743416336 | 0.003015614 | CLPTM1L  | 1.723908936 | 0.002688642 |
| MFPAP3L  | 2.102768582 | 0.038109341  | ARL17A   | 1.741922384 | 0.034933445 | MYL12A   | 1.722857158 | 0.021811718 |
| LEPREL4  | 2.101372886 | 0.002961053  | TRPMM    | 1.741108022 | 0.020336823 | IMPAD1   | 1.72156745  | 0.014972185 |
| WDR1     | 2.09403855  | 0.00302462   | MTL6     | 1.73890771  | 0.03846367  | SUN2     | 1.721382101 | 0.026696915 |
| HAS2     | 2.092720554 | 0.049980053  | ANO10    | 1.730065937 | 0.043103715 | EROL1    | 1.721200212 | 0.025881187 |
| PDILM5   | 2.089232152 | 0.003166841  | ZNF433   | 1.729718667 | 0.001361977 | B3GNT2   | 1.71120486  | 0.045827835 |
| TMEM132A | 2.082826189 | 0.00361982   | PXDC1    | 1.727718981 | 0.045489664 | CD151    | 1.710369048 | 0.037207198 |
| LRP12    | 2.084895328 | 0.00887233   | DAPK3    | 1.727580889 | 0.029368945 | FKRP     | 1.710138603 | 0.001265222 |
| BRP1     | 2.083852257 | 0.035536118  | DRP3     | 1.726790446 | 0.039324125 | LRWD1    | 1.709482855 | 0.038412137 |
| NEB      | 2.078921325 | 0.035536118  | IMPAD1   | 1.723794123 | 0.013753386 | POMGNAT1 | 1.703611478 | 0.048337225 |
| PLAUR    | 2.072788481 | 0.013385796  | SLX4     | 1.722967064 | 0.010915746 | SDSL     | 1.704204764 | 0.006629527 |
| BTN2A1   | 2.071031987 | 0.00012272   | IPPK     | 1.72037357  | 0.043103715 | SLC25A10 | 1.701746803 | 0.018512133 |
| PFKP     | 2.070446633 | 0.00884265   | SMURF1   | 1.718184922 | 0.012132734 | ALDOA    | 1.699544484 | 0.034384503 |
| SIPA1L1  | 2.07042728  | 2.16305E-05  | SUN2     | 1.716903177 | 0.029136573 | HAGH     | 1.690728255 | 0.031404166 |
| KAA15A9L | 2.069264016 | 0.043388386  | RBP2     | 1.714628246 | 0.02270748  | FUC4A    | 1.690244396 | 0.022840748 |
| DBND2    | 2.063323273 | 0.044506872  | DEGS1    | 1.714055637 | 0.032444064 | LMAN2    | 1.680263227 | 0.010432073 |
| MET      | 2.061464585 | 0.038685845  | ATP13A1  | 1.705303473 | 0.010399376 | DNASE2   | 1.679555055 | 0.017202707 |
| FAM19A   | 2.049684499 | 0.008721104  | TBC1D24  | 1.703247073 | 0.013909587 | PON2     | 1.677787899 | 0.024831996 |
| POIA3    | 2.047914258 | 0.004836797  | CREB3L1  | 1.696951635 | 0.044720497 | TMEM208  | 1.674838173 | 0.014737778 |
| NEO1     | 2.045403396 | 0.018458109  | ABC88    | 1.694488508 | 0.012635579 | CD63     | 1.674718314 | 0.023745329 |
| CTGF     | 2.044693833 | 0.046746327  | LMF2     | 1.694205193 | 0.040392213 | ATGAD    | 1.672669596 | 0.037613797 |
| PLD1     | 2.034003095 | 0.01122767   | BAK1     | 1.685366936 | 0.025314158 | CNPY2    | 1.672202619 | 0.020771209 |
| SLC26A10 | 2.030826414 | 0.029462139  | EHPB1L1  | 1.68419213  | 0.04069326  | SLC35B2  | 1.66681279  | 0.00471447  |
| LEPRE1   | 2.029635807 | 0.008946711  | CRELD2   | 1.683978332 | 0.010399376 | YIPF2    | 1.659853693 | 0.012227558 |
| MTH9     | 2.027610547 | 0.025479567  | AP1B1    | 1.681318819 | 0.041992334 | SDF4     | 1.655153149 | 0.017670688 |
| TMED9    | 2.02665156  | 0.04762765   | MARBP9   | 1.680866853 | 0.02386469  | PKM1     | 1.653664369 | 0.049570291 |
| TPPRJ    | 2.019686695 | 0.047333791  | MAGED1   | 1.677354808 | 0.003717576 | FBXL6    | 1.652217563 | 0.041466128 |
| YIF1B    | 2.016689652 | 0.001315244  | ZNF841   | 1.670497676 | 0.008396157 | NPDC1    | 1.650250954 | 0.047563502 |
| ACOT7    | 2.013163104 | 0.008622065  | CDK7     | 1.670019004 | 0.035817093 | ALKBH6   | 1.648455742 | 0.022840748 |
| TRIM62   | 2.012128319 | 0.021121021  | FKRP     | 1.667462122 | 0.001907338 | LRRC8A   | 1.638854873 | 0.041755618 |
| ALDH5A1  | 2.0087147   | 0.018943325  | SKAP2    | 1.667269445 | 0.023957652 | RRF4     | 1.633335605 | 0.028114566 |
| C11orf10 | 2.003238665 | 0.003126073  | LRCH4    | 1.666621315 | 0.040349222 | TXNDC15  | 1.633320862 | 0.014635187 |
| ALS2CR11 | 2.000054145 | 0.002058562  | C11orf24 | 1.665216382 | 0.010770573 | GBA      | 1.631266857 | 0.021030387 |
| IGFBP7   | 1.999770278 | 0.010453141  | RPN1     | 1.657969493 | 0.042476088 | VOPP1    | 1.631150935 | 0.038267913 |
| PAPSS2   | 1.991406589 | 0.03290312   | ACOX3    | 1.656980476 | 0.044011194 | SCAMP3   | 1.629821816 | 0.033056789 |
| OSOX2    | 1.984073878 | 0.014011258  | PIGO     | 1.653617577 | 0.013267369 | UBA1     | 1.628703212 | 0.01170653  |
| EMC1     | 1.982123159 | 0.00300191   | RBM28    | 1.6501053   | 0.00334672  | ERP44    | 1.627121319 | 0.014737411 |
| CHST7    | 1.98116437  | 0.041759006  | ZNF274   | 1.647947862 | 0.031264286 | ATP13A1  | 1.622464342 | 0.021687253 |
| TUSC3    | 1.980749187 | 0.00581515   | ALS2     | 1.647132395 | 0.039024125 | RAPH1    | 1.621786169 | 8.49972E-06 |
| SEL1L3   | 1.971116186 | 0.024580482  | TOM1L2   | 1.64573954  | 0.045489664 | RGN2     | 1.616981712 | 0.010695878 |
| LMOT     | 1.968342615 | 0.018302974  | APMAP    | 1.632990568 | 0.022594038 | LPFR2    | 1.616003152 | 0.006566578 |
| ATP10D   | 1.968317742 | 0.021797402  | DOCK6    | 1.629015438 | 0.027097385 | TRAF4    | 1.612986148 | 0.023881187 |
| PNP      | 1.967806022 | 0.02412546   | USP9X    | 1.622294236 | 0.022763681 | IN30C    | 1.612181873 | 0.006134297 |
| TUBB2A   | 1.966897674 | 0.004701835  | SLC35A2  | 1.622015286 | 0.023865469 | CLPTM1   | 1.607694572 | 0.04346075  |
| EXOC6    | 1.96557559  | 0.029626047  | USP35    | 1.621805123 | 0.045912644 | MAP7D1   | 1.607191624 | 0.041466128 |
| TPST2    | 1.964619036 | 0.010449903  | ITFG3    | 1.615327632 | 0.027664548 | KLC2     | 1.606608793 | 0.038412137 |
| RASSF3   | 1.9641433   | 0.045538589  | MRAP     | 1.604119369 | 0.034833445 | PWP2     | 1.600954595 | 0.020626709 |
| ITGB1    | 1.95957515  | 0.010676229  | MED14    | 1.602449765 | 0.019166532 | ZDHHC24  | 1.593884522 | 0.00943994  |
| RGN3     | 1.94283733  | 0.001134676  | GSF1     | 1.600326852 | 0.00954221  | ASL      | 1.58257774  | 0.009318474 |
| POI4B    | 1.942733029 | 0.014444026  | TNFAIP1  | 1.598130463 | 0.038879426 | EMC7     | 1.591379632 | 0.041466128 |
| PLEKHG2  | 1.94148447  | 0.006625283  | TRAF4    | 1.591563978 | 0.033613793 | NDUF55   | 1.588065611 | 0.020040987 |





|          |             |              |           |             |             |          |             |             |
|----------|-------------|--------------|-----------|-------------|-------------|----------|-------------|-------------|
| TXND015  | 1.528025971 | 0.003452337  | RPL13A    | 0.503485758 | 0.00602537  | WBP1L    | 0.555864896 | 0.016734047 |
| NAPTD1   | 1.527954475 | 0.013829211  | SERPNA81  | 0.503324226 | 0.047819277 | WAR52    | 0.55170231  | 0.033335551 |
| TOR1B    | 1.526957617 | 0.008858736  | NQO2      | 0.503153385 | 0.002156543 | ZNF277   | 0.55166936  | 0.015720067 |
| COMT01   | 1.525154095 | 0.040024762  | RPL13     | 0.502234327 | 0.004391066 | ENOX2    | 0.550932643 | 0.002450993 |
| RTN4     | 1.524453008 | 0.047105966  | C4orf46   | 0.501676854 | 0.035097286 | SNAI2    | 0.550062988 | 0.03397248  |
| FBXL6    | 1.523127297 | 0.026337043  | MRP95     | 0.498780565 | 0.002631571 | EEF1A1   | 0.549323418 | 0.004718802 |
| ACTG1    | 1.523091865 | 0.029663336  | REPU      | 0.497805722 | 0.00049296  | PKFKB2   | 0.548983228 | 0.020625709 |
| CEP170B  | 1.522716622 | 0.004679024  | CASP4     | 0.497644382 | 0.036047077 | ZFP14    | 0.547174961 | 0.014737778 |
| PACSIN2  | 1.521062059 | 0.002084654  | LHFPL2    | 0.496224824 | 0.025371657 | ZNF546   | 0.544887663 | 0.024831996 |
| DNASE2   | 1.518954192 | 0.015170815  | ZNF581    | 0.494696369 | 0.020459344 | RBPJ     | 0.543302834 | 0.003905087 |
| PKM      | 1.518931305 | 0.032366346  | IDH1      | 0.492828775 | 0.036289556 | CA12     | 0.542553524 | 0.042860245 |
| ESYT1    | 1.518304528 | 0.038687994  | CTSD      | 0.492002241 | 0.019419111 | HIPK3    | 0.541409538 | 0.031518699 |
| ARF4     | 1.515437536 | 0.014719474  | RBM43     | 0.492025329 | 0.040715047 | NAPFLD   | 0.539576035 | 0.014972185 |
| CLPTM1   | 1.510188345 | 0.019186166  | PITPNC1   | 0.487981551 | 0.025088206 | MFAS1    | 0.537244657 | 0.042775434 |
| KLC2     | 1.508678461 | 0.0153712    | SCARA5    | 0.487026135 | 0.031251213 | TRAM2    | 0.534035372 | 0.025640037 |
| PICALM   | 1.508389644 | 0.000581515  | FAXC      | 0.48563743  | 0.047942787 | CREBL2   | 0.53403112  | 0.011082659 |
| RUND01   | 1.507167359 | 0.047120977  | RPL12     | 0.484902135 | 0.002090098 | AUH      | 0.533903898 | 0.039123939 |
| GCN1L1   | 1.502862334 | 0.018458109  | MAB21L2   | 0.484569051 | 0.03746082  | RNF188   | 0.53212531  | 0.013387565 |
| TMEM50A  | 1.502869868 | 0.025362203  | RPS27     | 0.484438897 | 0.03918614  | TBC1D16  | 0.531004564 | 0.014625187 |
| EIF4G1   | 1.502549878 | 0.005648436  | SAP30     | 0.483558501 | 0.044633382 | GPD1L    | 0.529208961 | 0.037613707 |
| MROH8    | 1.502364632 | 0.000192047  | TRPS1     | 0.48347603  | 0.023672345 | TP53BP1  | 0.527912891 | 0.037840058 |
| GDH      | 1.500031611 | 0.009921477  | GYPC      | 0.475110393 | 0.040093213 | ZMIZ1    | 0.527246307 | 0.017175702 |
| ZNF419   | 1.498684434 | 0.018943325  | FTL       | 0.474038857 | 0.038894997 | RPS27    | 0.527093734 | 0.012227558 |
| VCP      | 1.497552497 | 0.03944819   | CEP19     | 0.469944344 | 0.037857331 | ZMAT3    | 0.526917268 | 0.010180284 |
| DOCK6    | 1.496915889 | 0.015934202  | TNFSF12   | 0.468141585 | 0.024788326 | EIF3E    | 0.526886913 | 0.00767578  |
| SEC61A1  | 1.495447547 | 0.009725353  | ATF5      | 0.467527235 | 0.039794682 | PSIP1    | 0.525308451 | 0.00223479  |
| PFKL     | 1.494767987 | 0.049734143  | NFX       | 0.466066426 | 0.0349452   | PRTFDC1  | 0.523355017 | 0.014915559 |
| DYNC1L2  | 1.493908629 | 0.023346753  | SLC47A2   | 0.461234411 | 0.041256953 | GLTSCR1L | 0.520675079 | 0.002135102 |
| ASL      | 1.491193346 | 0.010198711  | CAI1K1D   | 0.461032485 | 0.024786326 | DYNC2H1  | 0.519017468 | 0.014371507 |
| NFE2L1   | 1.489253764 | 0.002972781  | MMO       | 0.460478737 | 0.038261069 | ZNF141   | 0.51841453  | 0.013404166 |
| SDSL     | 1.489190731 | 0.03152409   | KLF3      | 0.459663148 | 0.01530444  | FAM129A  | 0.516987443 | 0.018501614 |
| SLC35E1  | 1.485614771 | 0.013889387  | CP        | 0.459176794 | 0.024878326 | NEUR12   | 0.51648966  | 0.041755618 |
| ZNF841   | 1.485237165 | 0.024799654  | GLDN      | 0.458563726 | 0.044232601 | NR1D2    | 0.515999784 | 0.012047974 |
| SDFA     | 1.485227073 | 0.020862518  | COLA2A1   | 0.457877816 | 0.006473919 | TEF      | 0.515192079 | 0.021098225 |
| MRAP     | 1.484841544 | 0.019312027  | C16orf96  | 0.457720298 | 0.040393678 | ANKK2    | 0.514571112 | 0.037613787 |
| NOL6     | 1.483427459 | 0.023603239  | IFIH1     | 0.457409856 | 0.000198118 | PRX      | 0.513466017 | 0.021986119 |
| GFM2     | 1.482849104 | 0.018775457  | DTX3L     | 0.455612585 | 0.026631062 | SAV1     | 0.510707038 | 0.031771869 |
| ZFYVE27  | 1.482814755 | 0.014015091  | NMI       | 0.453982167 | 0.017753135 | CTDSP2   | 0.510091853 | 0.013397886 |
| FAM98B   | 1.48173106  | 0.028029975  | FES       | 0.452734554 | 0.031264286 | WASF3    | 0.508310297 | 0.012813009 |
| MAKDE2   | 1.481449238 | 0.034583857  | SEPT1     | 0.451194132 | 0.037709724 | LNP1     | 0.507315391 | 0.034623786 |
| DHDDS    | 1.479785861 | 0.015884453  | CATSPER3  | 0.449834355 | 0.046703508 | RIF2     | 0.502291646 | 0.031518699 |
| CLPB     | 1.479108763 | 0.025385895  | FYN       | 0.448478317 | 0.021291411 | RBMS1    | 0.501956969 | 0.022840748 |
| TA13     | 1.478035796 | 0.025473016  | PLIN2     | 0.448306415 | 0.033195296 | TRO      | 0.501618589 | 0.014272946 |
| FUCA2    | 1.476745599 | 0.046538901  | C14orf132 | 0.446682224 | 0.024788326 | MAT2A    | 0.500071474 | 0.010833724 |
| GANAB    | 1.474722511 | 0.042954147  | SLC7A7    | 0.445745698 | 0.039820193 | TCF1L2   | 0.49821045  | 0.009748167 |
| FRZ2     | 1.47392397  | 0.030946572  | FGF13     | 0.444467364 | 0.023142101 | KLHL15   | 0.497388142 | 0.017202707 |
| TMEM66   | 1.47343087  | 0.00597915   | TNXB      | 0.442639115 | 0.020769288 | PSD3     | 0.494049079 | 0.028720516 |
| FAM115A  | 1.473115214 | 0.035536118  | LPAR1     | 0.439451094 | 0.01130998  | NXT2     | 0.493874439 | 0.011412039 |
| CNN3     | 1.472873556 | 0.033904775  | LGALS3    | 0.439396623 | 0.029368945 | RSRC1    | 0.489432962 | 0.002135102 |
| ZUFSP    | 1.470391754 | 0.003262319  | IDNK      | 0.439257587 | 0.035966345 | MAB21L2  | 0.489229886 | 0.032130248 |
| STT3A    | 1.46952196  | 0.025094215  | FAM20C    | 0.437395277 | 0.041868831 | SCARA5   | 0.487915504 | 0.029758509 |
| GBF1     | 1.465660784 | 0.007686772  | HRH1      | 0.436819827 | 0.042386077 | FAM175A  | 0.486543765 | 0.014623074 |
| WDR77    | 1.464834708 | 0.0482529    | FAM102B   | 0.435777657 | 0.032418224 | FYN      | 0.484719128 | 0.039321166 |
| PPP3CC   | 1.464585181 | 0.046678199  | SPATA6    | 0.434099385 | 0.024788326 | ZNF573   | 0.484489862 | 0.004955565 |
| PWP2     | 1.463966589 | 0.02018924   | SKX4      | 0.433544414 | 0.006824685 | GYPC     | 0.483479499 | 0.043318588 |
| SCAMP3   | 1.462970892 | 0.038207151  | KCNK1     | 0.432873496 | 0.043646282 | ITPKB    | 0.483385077 | 0.013538532 |
| LDHA     | 1.461089425 | 0.044984901  | UBE2L6    | 0.431583965 | 0.000550664 | BAHC1    | 0.48161903  | 0.040403598 |
| ITFG1    | 1.461064415 | 0.016784246  | REV3L     | 0.431341767 | 0.029843693 | LHFPL1   | 0.481595186 | 0.018979993 |
| EMC7     | 1.460877478 | 0.029213148  | BICC1     | 0.430992523 | 0.040607755 | IRAK1BP1 | 0.478478834 | 0.012464396 |
| UBA1     | 1.459950447 | 0.018485109  | ZNF883    | 0.430773596 | 0.021301191 | MAN1A1   | 0.473678167 | 0.025640037 |
| SLC39A13 | 1.459399712 | 0.024395057  | KIAA0930  | 0.429820223 | 0.040468202 | MTHFR    | 0.472790643 | 0.01510628  |
| GBE1     | 1.457610382 | 0.03948513   | STAP2     | 0.429550546 | 0.043597297 | WWOX     | 0.472543462 | 0.020801004 |
| CD276    | 1.455570532 | 0.007194025  | CLDN4     | 0.428680248 | 0.034933445 | ZCCHC14  | 0.472449183 | 0.012227558 |
| NOC2L    | 1.455236931 | 0.049014574  | TRAF3IP2  | 0.42853637  | 0.032597081 | NFIX     | 0.46997868  | 0.033787141 |
| RER1     | 1.455234485 | 0.025615796  | AXIN2     | 0.427901257 | 0.040093213 | NFIA     | 0.469963698 | 0.045827835 |
| DDOST    | 1.453820384 | 0.044506872  | GLUL      | 0.426901931 | 0.005690229 | SLCSA3   | 0.469485259 | 0.028957431 |
| ERP44    | 1.453352527 | 0.032337501  | SEPP1     | 0.425006432 | 0.040174466 | LTBP4    | 0.469164023 | 0.040264412 |
| LMNA2    | 1.452192361 | 0.033370048  | IFT1      | 0.4250473   | 0.038917178 | RBM43    | 0.468389126 | 0.031777111 |
| CREB3    | 1.44933904  | 0.030882573  | ARHGEP3   | 0.424292045 | 0.039288319 | GLTSCR2  | 0.466575988 | 0.037840058 |
| SLC35A3  | 1.448924744 | 0.028072544  | ZNF436    | 0.422056502 | 0.029012892 | PCDHGC3  | 0.466553951 | 0.038532409 |
| WDR60    | 1.44891497  | 0.04465691   | BOC       | 0.420721745 | 0.034553266 | FAXC     | 0.465420284 | 0.032531101 |
| VPS53    | 1.44708665  | 0.0035114051 | FAM167B   | 0.420055544 | 0.038046367 | HBPD     | 0.461694804 | 0.00884571  |
| MAN2A    | 1.446225365 | 0.00063311   | ADAMT58   | 0.418269799 | 0.023672345 | EIF4B    | 0.461688977 | 0.001031178 |





|          |             |             |          |             |             |         |             |             |
|----------|-------------|-------------|----------|-------------|-------------|---------|-------------|-------------|
| RBM23    | 0.797481907 | 0.031403601 | RPS8KA5  | 0.328264818 | 0.004123118 | CMYA5   | 0.372212032 | 0.018444992 |
| SLU7     | 0.789896644 | 0.011584031 | TWIST2   | 0.327650168 | 0.008907065 | MCXD1   | 0.370178613 | 0.017485548 |
| MAF1     | 0.785884797 | 0.026070709 | MSX2     | 0.327634191 | 0.012835579 | NAMPT   | 0.370038293 | 0.001350507 |
| PCID2    | 0.782969521 | 0.028966519 | PLCD3    | 0.327556974 | 0.006326595 | TRIM47  | 0.369125122 | 0.024578154 |
| NUP54    | 0.782325549 | 0.028728179 | GCH1     | 0.326781535 | 0.010970432 | FER1L6  | 0.368701318 | 0.011335356 |
| FINA     | 0.781152597 | 0.038199653 | RIPK3    | 0.326357333 | 0.012132734 | LRNMCL  | 0.368339698 | 0.023620641 |
| PGY1     | 0.780721267 | 0.039996343 | HOKA13   | 0.325181874 | 0.011803992 | DLX4    | 0.367636363 | 0.012047974 |
| TTCS     | 0.786158466 | 0.024848727 | IGFLR1   | 0.3251164   | 0.001073976 | RUNX1T1 | 0.367392562 | 0.015828136 |
| CSNK2A2  | 0.783384922 | 0.02469681  | MSX1     | 0.323668797 | 0.001176224 | EPST11  | 0.366698935 | 0.016539569 |
| CETN3    | 0.782324531 | 0.046941288 | TMEM258B | 0.322956102 | 0.010281034 | OAS1    | 0.366629879 | 0.021603548 |
| MEAF6    | 0.781037049 | 0.000122813 | ACSS1    | 0.32282423  | 0.010404761 | NPTX2   | 0.366249109 | 0.023905052 |
| COA3     | 0.778563334 | 0.047555551 | TNNT1    | 0.320206537 | 0.006563041 | KCNJ2   | 0.365648747 | 0.026066915 |
| ALKBH6   | 0.77785964  | 0.04425143  | TLRS     | 0.319807014 | 0.019505705 | SLOC41  | 0.364832369 | 0.014219036 |
| R3HDM2   | 0.775559111 | 0.02581786  | GNMB     | 0.318804133 | 0.008921336 | ANGPTL5 | 0.363418513 | 0.011239238 |
| SMARCE1  | 0.774902004 | 0.008019964 | RASD1    | 0.318096163 | 0.010281034 | CD34    | 0.365404849 | 0.021540655 |
| KCTD18   | 0.774086788 | 0.037861419 | EPST11   | 0.317640527 | 0.004876341 | FAM102B | 0.365230946 | 0.006566578 |
| MAX      | 0.772939127 | 0.010364161 | ANO2     | 0.317323374 | 0.003387538 | LNX1    | 0.35493014  | 0.016539569 |
| TBC1D15  | 0.771712416 | 0.044375453 | EMLIN2   | 0.316908343 | 0.010281034 | FTI3    | 0.354885011 | 0.015548116 |
| KAA1551  | 0.771898951 | 0.043851771 | SOXS     | 0.315024977 | 0.006108054 | SK1     | 0.354075149 | 0.014272946 |
| POLDIP3  | 0.768737189 | 0.020549778 | PTGER2   | 0.31449015  | 0.008905706 | GLI3    | 0.353556713 | 0.0094695   |
| GMPR2    | 0.767793188 | 0.018080439 | SHOX2    | 0.312381702 | 0.008965953 | GPR88   | 0.352728459 | 0.021251816 |
| FAM206A  | 0.764523165 | 0.038416814 | TBC1D8   | 0.311341135 | 0.00862671  | ABCC2   | 0.351882556 | 0.009594006 |
| NSMCE4A  | 0.760362426 | 0.023346753 | PT16     | 0.310612849 | 0.003827354 | ZNF853  | 0.349388553 | 0.017006334 |
| MBP      | 0.759238372 | 0.023533358 | AKR1C2   | 0.309963908 | 0.008905706 | RTN4RL2 | 0.348689028 | 0.020325257 |
| RHNO1    | 0.758103799 | 0.030701577 | IRAK3    | 0.308978088 | 0.008692233 | FGL2    | 0.348396439 | 0.014608076 |
| C11orf57 | 0.757732491 | 0.032105628 | CH25H    | 0.307688756 | 0.005692897 | DAPK2   | 0.348327757 | 0.020040987 |
| NSUN6    | 0.756953538 | 0.025711442 | CAPG     | 0.307337943 | 0.002532827 | CACNA1G | 0.347907582 | 0.010893497 |
| NCK1     | 0.755548959 | 0.027950209 | VWASA    | 0.30661152  | 0.006490204 | AXIN2   | 0.347902655 | 0.00927774  |
| STAG2    | 0.755053124 | 0.048655246 | SNED1    | 0.306450709 | 0.007470334 | SCBP    | 0.347077376 | 0.016957552 |
| GSTK1    | 0.754823808 | 0.040710554 | METTL7A  | 0.305653403 | 0.00748623  | VWASA   | 0.346278369 | 0.016551426 |
| PTRHD1   | 0.75480404  | 0.038172639 | FAM55C   | 0.304571306 | 0.007239034 | PESL    | 0.346191684 | 0.019445156 |
| RPL27    | 0.753939247 | 0.02340372  | AIM1     | 0.304272409 | 0.001189531 | TGFBFR3 | 0.34593923  | 0.012539341 |
| CDKAL1   | 0.753600443 | 0.049605452 | CTSS     | 0.303893553 | 0.007326748 | MOCS2   | 0.345879184 | 0.005789902 |
| MAZ2B    | 0.753101112 | 0.004631819 | LGJ      | 0.301329488 | 0.005400618 | CH25H   | 0.344624333 | 0.014737778 |
| TAS1     | 0.753063496 | 0.001134576 | BTBD11   | 0.300570752 | 0.005655651 | TCEAL7  | 0.344223554 | 0.018629201 |
| TMEM24   | 0.752771185 | 0.029945018 | CYP24A1  | 0.298666787 | 0.001614178 | TBC1D8  | 0.34396236  | 0.017526714 |
| PNP2     | 0.751289779 | 0.018218994 | MBNL3    | 0.297168117 | 0.00572745  | ST8SIA1 | 0.342399374 | 0.017880438 |
| PYGO2    | 0.749648209 | 0.043575209 | CYP19A1  | 0.296515748 | 0.004123118 | PDE3B   | 0.341936615 | 0.017548401 |
| ZNF570   | 0.749372968 | 0.036243655 | MAF      | 0.294279676 | 0.005845942 | ANO2    | 0.339062817 | 0.007842459 |
| CHIC2    | 0.749238547 | 0.02581786  | FAM134B  | 0.292567749 | 0.005655651 | APOL3   | 0.338913187 | 0.017006334 |
| THNSL1   | 0.749199408 | 0.042954147 | CA2      | 0.292172566 | 0.00162342  | APOL6   | 0.33888018  | 0.00943904  |
| UBE2B    | 0.74849     | 0.02207697  | DENND2A  | 0.291607703 | 0.004802859 | DCHS1   | 0.33866576  | 0.015340602 |
| NSL1     | 0.747747765 | 0.017386786 | IL1R1    | 0.291564989 | 0.003840905 | REV3L   | 0.337639077 | 0.003963836 |
| MEPCE    | 0.74728497  | 0.036172639 | ST8SIA1  | 0.286819408 | 0.004599551 | RPS8KA5 | 0.33715039  | 0.006566578 |
| TDRD3    | 0.744854816 | 0.039147179 | ADORA1   | 0.286446777 | 0.004123118 | PBX1    | 0.337020001 | 0.014737778 |
| ECST1    | 0.744075916 | 0.021238606 | WNT9A    | 0.285257698 | 0.003733871 | PIK6    | 0.33624396  | 0.00943904  |
| BRCC3    | 0.743467554 | 0.023484259 | LRRTM2   | 0.284066159 | 0.004065798 | TNNT1   | 0.33363165  | 0.010851368 |
| RBMX2    | 0.743084851 | 0.018960692 | AKR1C1   | 0.282863721 | 0.004208665 | TWIST2  | 0.33322666  | 0.011453252 |
| AP3S1    | 0.743030981 | 0.041048434 | ZNF385D  | 0.278662005 | 0.002156543 | PTGER2  | 0.332066479 | 0.014272946 |
| RAB4A    | 0.742284342 | 0.010845883 | DAPK2    | 0.277774283 | 0.003377211 | TMEM26  | 0.33185968  | 0.012993002 |
| COMMD6   | 0.74151374  | 0.020130983 | TSPAN11  | 0.277517072 | 0.002925382 | CA2     | 0.330157862 | 0.006804776 |
| ZNF280D  | 0.740590036 | 0.017346999 | RARRES3  | 0.275578121 | 0.002925382 | GRIA1   | 0.329182455 | 0.012596148 |
| CRBN     | 0.740276633 | 0.037945716 | STEAP1   | 0.275119136 | 0.000291511 | MBOAT1  | 0.328584899 | 0.008251909 |
| TBC1D14  | 0.739808948 | 0.04228002  | ARMC4    | 0.272848933 | 0.002878724 | AKR1C2  | 0.327215793 | 0.014219036 |
| ZRANB3   | 0.739599983 | 0.025991803 | ARC      | 0.270927867 | 0.002541083 | BEGAIN  | 0.326665485 | 0.011601596 |
| CHP1     | 0.738865174 | 0.026865171 | CLP      | 0.26662841  | 0.002331137 | PCDH12  | 0.326025568 | 0.013527167 |
| CTDNEP1  | 0.737746707 | 0.030701577 | BEGAIN   | 0.262242219 | 0.00142252  | METTL7A | 0.324591499 | 0.012853186 |

|           |             |              |         |             |             |         |             |             |
|-----------|-------------|--------------|---------|-------------|-------------|---------|-------------|-------------|
| INO80B    | 0.736447428 | 0.034934859  | FGL2    | 0.260528545 | 0.001048711 | SLC3A9  | 0.32402299  | 0.01238787  |
| FAM145B1  | 0.733556584 | 0.002378396  | SVT7    | 0.250336096 | 9.80495E-08 | SLC1A2  | 0.323201613 | 0.011513753 |
| GORAB     | 0.73569652  | 0.000155026  | TNFSF15 | 0.255657695 | 0.001560722 | CILP    | 0.322747057 | 0.012813009 |
| ARL14EP   | 0.735209367 | 0.024362599  | PCDH12  | 0.257095766 | 0.001616035 | GH11    | 0.321830816 | 0.011412039 |
| GABARAP   | 0.735119366 | 0.032001442  | PLA2G2A | 0.256946269 | 0.000291511 | SNX9    | 0.320789184 | 0.000037688 |
| DH40D     | 0.734416379 | 0.032785144  | FGF18   | 0.255385307 | 0.001048711 | PHK01   | 0.320662878 | 0.01238787  |
| ZNF227    | 0.730856716 | 0.014913136  | WNT11   | 0.252523943 | 0.001189531 | ISM1    | 0.315359184 | 0.011062659 |
| AFMID     | 0.730639485 | 0.029945018  | SCG5    | 0.252714704 | 0.000441284 | ARC     | 0.314477238 | 0.011056050 |
| TDP2      | 0.73050323  | 0.00988372   | IGSF9B  | 0.250112175 | 0.000319711 | PTGFRN  | 0.311366243 | 0.005150271 |
| ZFAND1    | 0.729958512 | 0.025615796  | SOD2    | 0.249553202 | 0.001048711 | AP3B2   | 0.310810315 | 0.010180284 |
| NAB1      | 0.729307085 | 0.030701577  | HTRA3   | 0.241766438 | 0.000899005 | FAM65E  | 0.308736194 | 0.00094695  |
| C1orf123  | 0.728658021 | 0.006831677  | BDKR2   | 0.236613089 | 0.000816411 | AKR1C1  | 0.307358994 | 0.009537453 |
| SPAG16    | 0.728158811 | 0.003701577  | HECW1   | 0.236257317 | 0.000857757 | F3      | 0.307298629 | 0.000629227 |
| MRPS27    | 0.727133004 | 0.014011258  | BAI1    | 0.230811448 | 0.000366309 | ADORA1  | 0.307074288 | 0.009113138 |
| DCP1B     | 0.726935799 | 0.028728179  | ZNF521  | 0.226038044 | 0.000366309 | MITF    | 0.306297819 | 0.007956942 |
| EXOC4     | 0.726730206 | 0.006315276  | TSKS    | 0.223775934 | 0.000211839 | MSX2    | 0.306217606 | 0.00043904  |
| ELF1      | 0.726299142 | 0.03040103   | ISM1    | 0.223024216 | 0.000358807 | SOX5    | 0.305205089 | 0.005572903 |
| XPA       | 0.725746234 | 0.049899223  | CLGN    | 0.220402635 | 0.000321076 | MAF     | 0.305072099 | 0.009249708 |
| UBAS2     | 0.72547441  | 0.025362203  | GPR88   | 0.219519834 | 0.000319711 | RPS6KA2 | 0.304538323 | 0.000378304 |
| PARS2     | 0.724226053 | 0.038862768  | THBD    | 0.21912972  | 0.000244658 | ERG     | 0.302083148 | 0.007038617 |
| MEDE6     | 0.724003143 | 0.001144755  | ERG     | 0.217881143 | 0.000235074 | DUOX2   | 0.300375013 | 0.008086745 |
| RPLP2     | 0.723239886 | 0.041875597  | CHIL2   | 0.200679692 | 5.14491E-05 | CYP2A1  | 0.300260396 | 0.002135102 |
| MRPL10    | 0.722296835 | 0.016239501  | FBLN2   | 0.200635647 | 0.000119377 | LRR1M2  | 0.296989898 | 0.007173693 |
| BAQ4      | 0.721761538 | 0.042228002  | HPD     | 0.199506369 | 2.38705E-05 | SNEK1   | 0.296757145 | 0.00804776  |
| RPSA      | 0.720757802 | 0.043590559  | DCHS1   | 0.196216459 | 5.80668E-05 | TNFSF15 | 0.293405865 | 0.005025119 |
| FAM92A1   | 0.720729996 | 0.012305045  | NTN1    | 0.190750086 | 2.51154E-05 | IL1R1   | 0.292504376 | 0.005143588 |
| ZNF32     | 0.720400814 | 0.0491749    | CLU     | 0.189818507 | 0.04383E-05 | DENND2A | 0.292447041 | 0.005904264 |
| ZNF543    | 0.719310483 | 0.039048513  | NTNG1   | 0.173358644 | 1.34249E-05 | COL2A1  | 0.289988957 | 1.4496E-06  |
| GRI1      | 0.71915825  | 0.004453785  | TNFAIP6 | 0.169536507 | 4.36156E-06 | ARMC4   | 0.289694457 | 0.00601592  |
| TRAPPC2L  | 0.718456906 | 0.03722671   | ADHA    | 0.160571777 | 3.59025E-06 | WNT9A   | 0.287805913 | 0.005143588 |
| SRI       | 0.717277475 | 0.02955705   | ADH1C   | 0.152302747 | 5.72104E-07 | AIM1    | 0.284264577 | 0.000471208 |
| PCNP      | 0.716109796 | 0.000926459  | CHLC1   | 0.103477489 | 2.80947E-10 | ZNF385D | 0.283777178 | 0.003327459 |
| MAST4     | 0.715740878 | 0.03290312   | HAND2   | 0.060665671 | 2.6387E-16  | OLFML2  | 0.283494729 | 0.005249388 |
| CASP7     | 0.713957138 | 0.002370382  |         |             |             | RARRRS3 | 0.282243091 | 0.004793078 |
| LRRCC3    | 0.71292761  | 0.021926663  |         |             |             | MEN3L   | 0.280338631 | 0.004345289 |
| RPL8      | 0.710952749 | 0.026055591  |         |             |             | IRAK3   | 0.279470354 | 0.004750851 |
| SLC25A26  | 0.710523819 | 0.023346753  |         |             |             | GSC     | 0.274958678 | 0.003965386 |
| EVC2      | 0.710205405 | 0.043590559  |         |             |             | ACSS1   | 0.270159485 | 0.002780476 |
| KCTD6     | 0.71019696  | 0.02581786   |         |             |             | PLA2G2A | 0.268081778 | 0.000471208 |
| GUCD1     | 0.709036368 | 0.008459778  |         |             |             | CYP19A1 | 0.265097701 | 0.001804871 |
| ST13      | 0.707813071 | 0.001985632  |         |             |             | FGF18   | 0.26332521  | 0.001463168 |
| ATG4C     | 0.707591205 | 0.028079774  |         |             |             | LRFN5   | 0.261248136 | 0.002252747 |
| SNX5      | 0.707356834 | 0.01306143   |         |             |             | SLC2A12 | 0.259202046 | 0.002135102 |
| THAP11    | 0.706773181 | 0.013868388  |         |             |             | SVT7    | 0.257566295 | 8.83137E-08 |
| CEP57     | 0.706155993 | 0.0411010727 |         |             |             | SOD2    | 0.256869607 | 0.001381752 |
| TGCL5     | 0.70595821  | 0.01089741   |         |             |             | STMN3   | 0.252222242 | 0.000151686 |
| BTFC      | 0.704962633 | 0.010699741  |         |             |             | BDKR2   | 0.249749406 | 0.001453168 |
| DNAJC19   | 0.704102195 | 0.001187426  |         |             |             | FAM134B | 0.240570543 | 0.00100881  |
| STK16     | 0.703676428 | 0.037288613  |         |             |             | TSKS    | 0.234580375 | 0.000363599 |
| RPL38     | 0.703337032 | 0.017123716  |         |             |             | IGSF9B  | 0.233510985 | 0.000109045 |
| OM1L      | 0.702402879 | 0.001080788  |         |             |             | SHOX2   | 0.231323179 | 0.00041477  |
| PITPNM2   | 0.702201353 | 0.026930995  |         |             |             | WNT11   | 0.230081543 | 0.000378304 |
| FBXO4     | 0.701957043 | 0.008622665  |         |             |             | CHSL2   | 0.22940342  | 0.000294343 |
| UBE2E3    | 0.701754035 | 0.00612152   |         |             |             | EMILN2  | 0.221124709 | 0.000363599 |
| AOBE3F    | 0.701506418 | 0.037625219  |         |             |             | HPD     | 0.212650968 | 5.0866E-05  |
| LACTB2    | 0.701384857 | 0.031627855  |         |             |             | BAI1    | 0.209029637 | 9.83825E-05 |
| CLNA1A    | 0.70098463  | 0.016158466  |         |             |             | ABC9C   | 0.203292527 | 4.58759E-05 |
| TOR1AIP1  | 0.70039557  | 0.03722671   |         |             |             | CLU     | 0.201542969 | 9.2987E-05  |
| DUT       | 0.698418766 | 0.042954147  |         |             |             | ZNF521  | 0.19741106  | 6.30933E-05 |
| RPS7      | 0.697820406 | 0.030643227  |         |             |             | FBLN2   | 0.183320938 | 2.59261E-05 |
| PCGF6     | 0.697663881 | 0.017987067  |         |             |             | NTN1    | 0.176449648 | 5.94075E-06 |
| RBP9      | 0.697232984 | 0.030637417  |         |             |             | NTNG1   | 0.173043934 | 9.5296E-06  |
| BBS2      | 0.697124565 | 0.025906018  |         |             |             | MMP1    | 0.167496223 | 5.94075E-06 |
| SEPT10    | 0.696937309 | 0.033891448  |         |             |             | ADH1C   | 0.149568091 | 3.0866E-07  |
| UQCRLB    | 0.69688323  | 0.010386738  |         |             |             | ADHA    | 0.136613965 | 1.3286E-07  |
| AKRTA2    | 0.695952338 | 0.022925736  |         |             |             | TNFAIP6 | 0.132938709 | 8.83137E-08 |
| PHB2      | 0.695717888 | 0.012365567  |         |             |             | CCRL1   | 0.104485815 | 3.5020E-06  |
| MED29     | 0.69545017  | 0.016530348  |         |             |             | HAND2   | 0.060624207 | 5.52467E-16 |
| KIAA1143  | 0.694160908 | 0.03397637   |         |             |             |         |             |             |
| NEK9      | 0.693494661 | 0.034021535  |         |             |             |         |             |             |
| WASL      | 0.693313552 | 0.025094215  |         |             |             |         |             |             |
| NTSC3B    | 0.693102544 | 0.039743909  |         |             |             |         |             |             |
| FAM121B   | 0.692770329 | 0.043799959  |         |             |             |         |             |             |
| EIF3F     | 0.692767383 | 0.001028158  |         |             |             |         |             |             |
| T0B2      | 0.692730484 | 0.042228002  |         |             |             |         |             |             |
| RNF114    | 0.69215685  | 0.00827161   |         |             |             |         |             |             |
| RPS27A    | 0.691274812 | 0.006852747  |         |             |             |         |             |             |
| KLHDC2    | 0.690812342 | 0.025473016  |         |             |             |         |             |             |
| ZNF438    | 0.687461954 | 0.031398822  |         |             |             |         |             |             |
| RNL5      | 0.687185712 | 0.020146107  |         |             |             |         |             |             |
| RPS24     | 0.687064282 | 0.009671452  |         |             |             |         |             |             |
| RAB33B    | 0.685309479 | 0.025160186  |         |             |             |         |             |             |
| RPL37A    | 0.685197538 | 0.003740474  |         |             |             |         |             |             |
| DACP2     | 0.684592832 | 0.016359989  |         |             |             |         |             |             |
| C19orf66  | 0.684344504 | 0.026243648  |         |             |             |         |             |             |
| STAG1     | 0.684135207 | 0.005413376  |         |             |             |         |             |             |
| LETMD1    | 0.683845894 | 0.012231346  |         |             |             |         |             |             |
| EIF3H     | 0.683640064 | 0.005589892  |         |             |             |         |             |             |
| CCDC97    | 0.682368687 | 0.019151442  |         |             |             |         |             |             |
| APLF      | 0.682206637 | 0.040817386  |         |             |             |         |             |             |
| MAP2K2    | 0.682201782 | 0.030345596  |         |             |             |         |             |             |
| LAYN      | 0.682087889 | 0.031802663  |         |             |             |         |             |             |
| ARL2      | 0.682021741 | 0.025991603  |         |             |             |         |             |             |
| SPRED2    | 0.681857377 | 0.016213706  |         |             |             |         |             |             |
| MED28     | 0.681600576 | 0.017306326  |         |             |             |         |             |             |
| SSBP4     | 0.681638469 | 0.017346999  |         |             |             |         |             |             |
| GSTA4     | 0.681510242 | 0.023337501  |         |             |             |         |             |             |
| PSMG2     | 0.68144763  | 0.008350971  |         |             |             |         |             |             |
| N6AMT2    | 0.681256374 | 0.042849324  |         |             |             |         |             |             |
| RNS       | 0.681235487 | 0.042261253  |         |             |             |         |             |             |
| CCNG1     | 0.68033232  | 0.021011079  |         |             |             |         |             |             |
| XPC       | 0.679789285 | 0.023338565  |         |             |             |         |             |             |
| SP1       | 0.679574901 | 0.029663336  |         |             |             |         |             |             |
| RPS15     | 0.679399871 | 0.01925014   |         |             |             |         |             |             |
| LRRK1     | 0.67927944  | 0.030701577  |         |             |             |         |             |             |
| NCA1      | 0.678967635 | 0.012305045  |         |             |             |         |             |             |
| CRPT      | 0.678785804 | 0.004518944  |         |             |             |         |             |             |
| STAT6     | 0.677576958 | 0.038805225  |         |             |             |         |             |             |
| ZNF689    | 0.677341503 | 0.046878113  |         |             |             |         |             |             |
| CCDC111   | 0.677118506 | 0.041006749  |         |             |             |         |             |             |
| LIAS      | 0.677108755 | 0.007978847  |         |             |             |         |             |             |
| GABARAPL1 | 0.676947633 | 0.045886559  |         |             |             |         |             |             |
| FTO       | 0.676531316 | 0.038363353  |         |             |             |         |             |             |
| RPL24     | 0.67579516  | 0.01776808   |         |             |             |         |             |             |
| UNC119B   | 0.675775661 | 0.033091449  |         |             |             |         |             |             |
| PAIRC1    | 0.675538771 | 0.004825567  |         |             |             |         |             |             |
| RPS10     | 0.67465721  | 0.00751711   |         |             |             |         |             |             |
| ELF2      | 0.67408355  | 0.021824715  |         |             |             |         |             |             |
| MTMR11    | 0.673763984 | 0.046538901  |         |             |             |         |             |             |
| RPL39L    | 0.673500109 | 0.037228906  |         |             |             |         |             |             |
| PP4M      | 0.673419305 | 0.016664874  |         |             |             |         |             |             |
| ANKRD16   | 0.67286943  | 0.022402211  |         |             |             |         |             |             |
| DENND1A   | 0.672472988 | 0.036532316  |         |             |             |         |             |             |
| KCTD3     | 0.671511172 | 0.002366819  |         |             |             |         |             |             |
| H0XC9     | 0.67133723  | 0.005583015  |         |             |             |         |             |             |
| RAD51B    | 0.670878511 | 0.041687934  |         |             |             |         |             |             |
| PONXL2    | 0.670443824 | 0.042954147  |         |             |             |         |             |             |
| DESI2     | 0.670417992 | 0.03722871   |         |             |             |         |             |             |
| RPS28     | 0.670312662 | 0.018458109  |         |             |             |         |             |             |

|          |             |             |
|----------|-------------|-------------|
| FAM135A  | 0.670007454 | 0.037330356 |
| UBE2D1   | 0.668917651 | 0.019454569 |
| RPS29    | 0.668683712 | 0.016988488 |
| PABPC4   | 0.668068978 | 0.003171025 |
| RSL24D1  | 0.66765044  | 0.004999475 |
| FAM53B   | 0.666645396 | 0.039147179 |
| CCDC25   | 0.66648892  | 0.009344013 |
| FAM104B  | 0.66636905  | 0.009169487 |
| TANK     | 0.666178833 | 0.047670509 |
| CLK1     | 0.665382908 | 0.03751804  |
| MYL6B    | 0.664407708 | 0.034588176 |
| KCTD2    | 0.664407309 | 0.023389075 |
| RPL36    | 0.661974549 | 0.021322789 |
| RNASEH2B | 0.661827051 | 0.01037017  |
| RPL35A   | 0.661587628 | 0.010626561 |
| RPL27A   | 0.661354903 | 0.007537637 |
| DEK      | 0.660039644 | 0.005917804 |
| SWT1     | 0.65993664  | 0.006874222 |
| IMPDH2   | 0.659575229 | 0.029130983 |
| C5orf85  | 0.659106303 | 0.018943325 |
| SDHD     | 0.658436808 | 0.007110294 |
| CCDC149  | 0.657842712 | 0.002710775 |
| ATF1     | 0.657363537 | 0.001986054 |
| UBXN1    | 0.656937551 | 0.00984342  |
| TMCO6    | 0.656881324 | 0.025991603 |
| MLL7     | 0.655837857 | 0.015774888 |
| TOP1MT   | 0.655485508 | 0.007177965 |
| PTPN9    | 0.655441773 | 0.004518944 |
| ZBTB44   | 0.655041998 | 0.014904984 |
| RPL6     | 0.654688847 | 0.003130523 |
| NACA     | 0.653387709 | 0.00816949  |
| TXNRD3   | 0.65323492  | 0.042812694 |
| RAP2B    | 0.65317718  | 0.048806547 |
| BTD2     | 0.652701217 | 0.002590536 |
| EEF2     | 0.652553407 | 0.000789862 |
| PABPC3   | 0.651782855 | 0.00089455  |
| SEPN1    | 0.650411361 | 0.033891448 |
| BTNA3    | 0.650395314 | 0.018775321 |
| NACA2    | 0.650160923 | 0.019849389 |
| PDCD7    | 0.649412819 | 0.001088517 |
| RVBP     | 0.649139584 | 0.046941288 |
| RPL1     | 0.648240953 | 0.005735595 |
| BZW1     | 0.648239934 | 0.049461999 |
| ANKRD28  | 0.64765297  | 0.020035411 |
| TYSD1    | 0.647396177 | 0.010676229 |
| CNBP     | 0.646819205 | 0.005927945 |
| SMARCA2  | 0.646576425 | 0.028079774 |
| TBC1D5   | 0.646013582 | 0.030701577 |
| TRIM21   | 0.644479228 | 0.008043368 |
| RPL29    | 0.644346399 | 0.00436927  |
| SDCBP    | 0.644059952 | 0.03438529  |
| PPP2R5A  | 0.643803855 | 0.009874768 |
| RPL23    | 0.643694594 | 0.002856613 |
| RPL15    | 0.643686812 | 9.08477E-05 |
| FBL      | 0.643361564 | 0.024019414 |
| CTDSP1   | 0.643157582 | 0.048297797 |
| RPS3     | 0.643037432 | 0.003270527 |
| OARD1    | 0.642306443 | 0.018742614 |
| LRP11    | 0.641862418 | 0.047248795 |
| IRF9     | 0.641001028 | 0.005353432 |
| RNF168   | 0.640973383 | 0.04324339  |
| UNG      | 0.640829099 | 0.0143521   |
| WDR19    | 0.640814575 | 0.002414439 |
| NUDT11   | 0.640750474 | 0.016213706 |
| CUX1     | 0.640721053 | 0.024789654 |
| FBXL14   | 0.639641955 | 0.039358018 |
| PCMTD2   | 0.639590971 | 0.043388386 |
| METTL12  | 0.639048781 | 0.045162343 |
| EAPP     | 0.639034644 | 0.010099439 |
| RAB40B   | 0.638480975 | 0.015740137 |
| KIAA1614 | 0.638399507 | 0.03882573  |
| ADPRM    | 0.638309153 | 0.005683298 |
| ZBTB2    | 0.637803059 | 0.018751211 |
| FGY      | 0.637759985 | 0.033570433 |
| RPL21    | 0.63749795  | 0.001028158 |
| FANCL    | 0.637295857 | 0.000566451 |
| SLC43A1  | 0.636617468 | 0.029290582 |
| GLCL     | 0.634041818 | 0.002044466 |
| MPL45    | 0.634034217 | 0.00106294  |
| RPS12    | 0.633882233 | 0.013198729 |
| WDR45    | 0.633689196 | 0.007571171 |
| RPL23A   | 0.63348762  | 0.002536473 |
| POLR1D   | 0.631201009 | 0.004847497 |
| RPS2     | 0.631162719 | 0.01373177  |
| HRSP12   | 0.630305983 | 0.013421577 |
| EEF1G    | 0.628725691 | 0.00168778  |
| RPS4X    | 0.627820452 | 0.037308734 |
| FAM5A    | 0.627446784 | 0.002767446 |
| RPL41    | 0.627294449 | 0.001526982 |
| SETD8    | 0.627195184 | 0.031802683 |
| RPL37    | 0.626636724 | 0.002247877 |
| C8orf37  | 0.626577774 | 0.019982324 |
| TMEM216  | 0.626452843 | 0.003825558 |
| HSPBAP1  | 0.625656836 | 0.036271243 |
| EF2D     | 0.625640655 | 0.00137414  |
| RAB8B    | 0.625532338 | 0.019131442 |
| C11orf1  | 0.625294802 | 0.025637205 |
| PRMT6    | 0.625177439 | 0.004695378 |
| YBEY     | 0.624545561 | 0.014969201 |
| MGMT     | 0.624287413 | 0.016193086 |
| UBTD2    | 0.623875908 | 0.012056948 |
| WTAP     | 0.623737592 | 0.008404208 |
| DYNC2H1  | 0.622165537 | 0.04228002  |
| LRRCA9   | 0.622114415 | 0.002374199 |
| RPL11    | 0.621068997 | 0.001603593 |
| FT89     | 0.621068701 | 0.01102721  |
| RPS5     | 0.620540899 | 0.005403518 |
| RPL19    | 0.619669512 | 0.001021656 |
| NHEJ1    | 0.619317198 | 0.003590305 |
| CCDC23   | 0.619291114 | 0.036522048 |
| MAP3K12  | 0.618988454 | 0.038017966 |
| C5orf40  | 0.618731954 | 0.008020113 |
| NAPEPLD  | 0.618042391 | 0.018501306 |
| RPL22    | 0.617827337 | 0.000964807 |
| LYRM4    | 0.616669636 | 0.000345835 |
| RPL9     | 0.616456591 | 0.001110653 |
| RPS11    | 0.61612946  | 0.005089991 |
| CSDA     | 0.616045259 | 0.00026327  |
| ENOX2    | 0.615608404 | 0.001298711 |
| METTL9   | 0.615218037 | 0.000645654 |
| RPL30    | 0.614767331 | 0.000843932 |
| CUTC     | 0.61448519  | 0.013029512 |
| SPTA7    | 0.614414686 | 0.021915478 |
| RPS16A   | 0.614378961 | 0.001187506 |
| RPS19    | 0.614188091 | 0.005657736 |
| MAMLD1   | 0.614179115 | 0.022274887 |
| C4orf82  | 0.613666386 | 0.008561115 |
| RPS13    | 0.612379975 | 0.001767896 |
| RPS14    | 0.611587401 | 0.0004554   |

|            |             |             |
|------------|-------------|-------------|
| GNBL1      | 0.611332576 | 0.000964331 |
| PCLR2M     | 0.610406984 | 0.0208817   |
| ZNF546     | 0.610386008 | 0.018943325 |
| TEF        | 0.610153686 | 0.038685845 |
| GLTSCR1L   | 0.609558685 | 0.005367783 |
| HBP1       | 0.609238286 | 0.011695724 |
| CNTL1      | 0.609203394 | 0.011227767 |
| BLOC1S5    | 0.609142669 | 0.026594681 |
| Csor64     | 0.609081123 | 0.016331202 |
| SYF2       | 0.608421773 | 0.002516003 |
| ZADH2      | 0.607780377 | 0.003418986 |
| MFHAS1     | 0.607742583 | 0.043355937 |
| SEKRGF     | 0.607709941 | 0.02045227  |
| GLB1L      | 0.60759014  | 0.031757019 |
| MYD88      | 0.60747344  | 0.019750545 |
| TRIB1      | 0.607429307 | 0.002235664 |
| RPL39      | 0.607239793 | 0.002374199 |
| PTPN2      | 0.607127056 | 0.04838468  |
| LDLRAD3    | 0.606457574 | 0.046501964 |
| RPL5       | 0.60610213  | 0.000926459 |
| MACROD1    | 0.605950827 | 0.0414994   |
| RPL32      | 0.605724801 | 0.000555033 |
| VPS51      | 0.60524253  | 0.013749334 |
| NOB1       | 0.605234916 | 0.013834786 |
| RPL18      | 0.605049095 | 0.002386819 |
| NQO2       | 0.604504718 | 0.016213706 |
| CCDC28A    | 0.604106449 | 0.002933713 |
| RPL34      | 0.603814794 | 0.002071816 |
| KANK2      | 0.603428924 | 0.041875987 |
| SAMHD1     | 0.603184685 | 0.047198421 |
| C11orf54   | 0.603035707 | 0.015703833 |
| RPL14      | 0.602211058 | 0.000404398 |
| HOXC6      | 0.601847729 | 0.03517381  |
| KBTBD3     | 0.601844179 | 0.019173379 |
| CNRP1      | 0.601603467 | 0.02041824  |
| LSM6       | 0.601094647 | 0.002088945 |
| TKT        | 0.600489791 | 0.032452406 |
| TASP1      | 0.599336229 | 0.023337501 |
| RPL28      | 0.599036996 | 0.007396801 |
| RPL4       | 0.598994299 | 0.000711226 |
| MAPK9P1    | 0.598406318 | 0.016453657 |
| RPL7A      | 0.597696162 | 0.002623514 |
| UBL3       | 0.597311461 | 0.010547162 |
| TBC1D16    | 0.597240684 | 0.020813215 |
| RPS3A      | 0.597032328 | 0.00069937  |
| ENOSF1     | 0.596551719 | 0.019750545 |
| CCDC71L    | 0.595606458 | 0.024680084 |
| ZNF358     | 0.59537391  | 0.019480821 |
| ZMZ1       | 0.594989263 | 0.015884453 |
| KLHDC1     | 0.594973285 | 0.025845382 |
| CCNB1P1    | 0.594784642 | 0.76535E-07 |
| HOXC5      | 0.594738881 | 0.003065383 |
| IL17RB     | 0.594617282 | 0.019633077 |
| TRPV1      | 0.594248173 | 0.009088835 |
| RPS20      | 0.594120997 | 0.002623514 |
| NFKBIA     | 0.593809907 | 0.04485691  |
| TRERF1     | 0.593529727 | 0.013083961 |
| RAB9A      | 0.593441677 | 0.000645654 |
| CAMLG      | 0.593203731 | 0.002730486 |
| RPL10A     | 0.593115413 | 0.001021656 |
| RPL17      | 0.593065713 | 0.000843932 |
| APPL2      | 0.592104049 | 0.028120566 |
| RPS25      | 0.591362182 | 0.00265375  |
| CTF1       | 0.589152959 | 0.009073863 |
| RBPJ       | 0.589126462 | 0.010261076 |
| WARS2      | 0.587556769 | 0.011196079 |
| FRKDCBP    | 0.587198889 | 0.020130963 |
| RPL18A     | 0.586888446 | 0.001087398 |
| KLHL15     | 0.586138111 | 0.026337043 |
| CHRAC1     | 0.585681115 | 0.004486262 |
| TGIF1      | 0.584883528 | 0.001234247 |
| RPS16      | 0.584248017 | 0.0093854   |
| MED30      | 0.583784626 | 0.009690054 |
| EVC        | 0.58153931  | 0.025637205 |
| CREBL2     | 0.581363281 | 0.0028817   |
| NUDT7      | 0.58105199  | 0.044453234 |
| WIPF1      | 0.581003533 | 0.009273495 |
| RPL31      | 0.580924084 | 0.000329687 |
| EP3L       | 0.578212695 | 0.003036043 |
| TPT1       | 0.578065746 | 0.002631297 |
| DPH5       | 0.57738695  | 0.000889629 |
| EMP1       | 0.57722046  | 0.028888517 |
| HELB       | 0.576769981 | 0.021824715 |
| HSCB       | 0.575462252 | 0.001509852 |
| GPX4       | 0.573738952 | 0.016213706 |
| PTMA       | 0.573044413 | 0.00699065  |
| TMEM116    | 0.573030456 | 0.007134141 |
| RPS9       | 0.572887572 | 0.000134742 |
| CMBL       | 0.572757958 | 0.000201086 |
| RPL1D      | 0.571237385 | 0.001187426 |
| RPS8       | 0.571954606 | 1.62504E-05 |
| OTUD1      | 0.571893989 | 0.017965355 |
| C14orf159  | 0.569729543 | 0.012365567 |
| RPLP0      | 0.569099927 | 0.000926459 |
| RBM1       | 0.568207558 | 0.021539367 |
| ZCCHC14    | 0.567938761 | 0.026594681 |
| PLK1S1     | 0.567680435 | 0.002528644 |
| AK1        | 0.567022675 | 0.043388386 |
| RAB31      | 0.566867828 | 0.016359989 |
| RPS6       | 0.566594235 | 0.000656492 |
| PWV1L4     | 0.566337035 | 0.025194807 |
| PLA2G6     | 0.566015524 | 0.028541836 |
| ZNF277     | 0.5658446   | 0.001088798 |
| RPL13      | 0.565540685 | 0.003035133 |
| ZNF524     | 0.565097759 | 0.004496252 |
| RPS23      | 0.564239261 | 0.003035295 |
| BNC2       | 0.563920385 | 0.041055725 |
| EML1       | 0.563721264 | 0.049245129 |
| AR15A      | 0.562280396 | 0.043388386 |
| ADH5       | 0.562148515 | 0.006976626 |
| MAN1A1     | 0.561874105 | 0.043650034 |
| SN42       | 0.561739845 | 0.004902705 |
| RPL7       | 0.561734935 | 0.000191311 |
| EFHC1      | 0.561673474 | 0.007194025 |
| NXT2       | 0.561319588 | 0.005480359 |
| FOXN3      | 0.56096616  | 0.043683261 |
| C10N       | 0.559403651 | 0.046257451 |
| PSIP1      | 0.559232131 | 0.000179522 |
| EEF1A1     | 0.557686045 | 0.000215369 |
| ZNF572     | 0.556584841 | 0.039147179 |
| RPL26      | 0.555944504 | 0.000264797 |
| RSRC1      | 0.554768803 | 0.002235684 |
| STEGALNAC4 | 0.554332752 | 0.007194025 |
| PKIG       | 0.553501731 | 0.004614162 |
| RPL3       | 0.552974412 | 0.000283825 |
| WBPHL      | 0.552578245 | 0.000843932 |
| CTSD       | 0.552530678 | 0.015208304 |
| RPL13A     | 0.552008589 | 0.00196912  |
| TRIM69     | 0.551623548 | 0.031097283 |

|            |             |             |
|------------|-------------|-------------|
| SATB1      | 0.551621923 | 0.04844267  |
| TRIM25     | 0.551345096 | 0.030570133 |
| NABP2      | 0.550159573 | 0.02957689  |
| RPL12      | 0.548538313 | 0.001717796 |
| ISCU       | 0.548481673 | 0.001348896 |
| CRBEHF     | 0.547871313 | 0.016013866 |
| FUZ        | 0.547852988 | 0.045280989 |
| IGBP1      | 0.547415278 | 0.000380464 |
| IDH1       | 0.546781796 | 0.030495198 |
| PXK        | 0.54667751  | 0.01301391  |
| PLTP       | 0.545493923 | 0.026856575 |
| CTDSP2     | 0.543814347 | 0.002580536 |
| C11orf52   | 0.543424139 | 0.011685724 |
| MRPS6      | 0.542888912 | 0.000874519 |
| WVOX       | 0.541809627 | 0.023968559 |
| SAP30      | 0.541435884 | 0.03720046  |
| SIAE       | 0.54112723  | 0.026300154 |
| GSTM2      | 0.539907219 | 0.008186278 |
| APOBEC3D   | 0.539139596 | 0.008571077 |
| CASP4      | 0.535892127 | 0.015934202 |
| RNASE4     | 0.53542434  | 0.035937117 |
| RARG       | 0.534758587 | 0.047378295 |
| MM2A       | 0.534321741 | 0.001717827 |
| DPYSL2     | 0.533508188 | 0.024581973 |
| CCDC35B    | 0.532958713 | 0.023089658 |
| LPAR1      | 0.531338871 | 0.025479567 |
| ACYP1      | 0.530828696 | 0.042077171 |
| TMEM180    | 0.53076077  | 0.002512509 |
| ST6GALNAC6 | 0.530624311 | 0.007059574 |
| GPX1       | 0.530331639 | 0.01929418  |
| GPR68      | 0.529379813 | 0.021698764 |
| EIF3E      | 0.52886387  | 0.00021419  |
| CYBSA      | 0.528021161 | 0.038834491 |
| FAM175A    | 0.527789093 | 0.004631819 |
| TSK3       | 0.526565668 | 0.01037017  |
| TRAPPC5A   | 0.52563606  | 0.040298762 |
| RIN2       | 0.524893772 | 0.003727616 |
| TFAP4      | 0.524301808 | 0.037927455 |
| PRX        | 0.523777801 | 0.002483607 |
| HOXC10     | 0.523703959 | 0.013385796 |
| NEURL2     | 0.523596173 | 0.006467294 |
| CDC25B     | 0.520199739 | 0.005413376 |
| C5         | 0.518580922 | 0.020722752 |
| C16orf45   | 0.517610208 | 0.03705712  |
| RAA40A     | 0.517571271 | 0.024034757 |
| EIF4B      | 0.517477612 | 0.000708614 |
| AUH        | 0.517392403 | 0.002235664 |
| TNFRSF14   | 0.516222144 | 0.005105555 |
| CD302      | 0.515721437 | 0.043595059 |
| ZNF581     | 0.513659684 | 0.002835558 |
| C14orf93   | 0.513632027 | 0.005444458 |
| ZFP36      | 0.511609925 | 0.029290582 |
| RALGPS2    | 0.511164845 | 0.044226478 |
| ACADS      | 0.510307046 | 0.034891625 |
| EVA1C      | 0.510139632 | 0.047930224 |
| PLEKH44    | 0.509829041 | 0.007899912 |
| MTHFR      | 0.509341721 | 0.004013834 |
| HOXC4      | 0.509035523 | 0.014000311 |
| ZCCHC24    | 0.508955277 | 0.020035411 |
| NFX        | 0.508433797 | 0.031180592 |
| C16orf86   | 0.507783994 | 0.039680419 |
| SEMA4A     | 0.507241234 | 0.033976517 |
| CAMK1D     | 0.505371141 | 0.025180186 |
| DHX58      | 0.504830882 | 0.023603239 |
| ZC2HC1C    | 0.504545494 | 0.039635204 |
| PHYHIP     | 0.504475966 | 0.032000142 |
| RFS27      | 0.503802347 | 0.000148039 |
| GOLM1I     | 0.502873764 | 0.02152157  |
| IRF2       | 0.501655835 | 0.004142614 |
| IRAK1BP1   | 0.501405679 | 0.00069937  |
| COL24A1    | 0.498894249 | 0.048874276 |
| SPATA25    | 0.498181946 | 0.039003701 |
| FTL        | 0.497203889 | 0.013982806 |
| YPEL3      | 0.496530462 | 0.013682911 |
| LHFPL2     | 0.495993046 | 0.003170282 |
| C1orf21    | 0.495003858 | 0.020035411 |
| FAM108C1   | 0.493361063 | 0.015867808 |
| SAV1       | 0.49245134  | 0.001767896 |
| RBM43      | 0.490797094 | 0.013704474 |
| ITPKB      | 0.49045881  | 0.00077641  |
| ATF3       | 0.490271649 | 0.006845265 |
| ENO4       | 0.488968983 | 0.036288462 |
| C4orf46    | 0.48887832  | 0.002247877 |
| TCEA3      | 0.487692674 | 0.046015956 |
| PTPLAD2    | 0.485804271 | 0.031627855 |
| GPER       | 0.484754149 | 0.024102668 |
| RILP       | 0.484447708 | 0.025094215 |
| SORDL      | 0.484423317 | 0.020035411 |
| TNFSF12    | 0.482049803 | 0.005114533 |
| SHSD19     | 0.478559649 | 0.003523447 |
| STAP2      | 0.478880841 | 0.042546713 |
| CLYBL      | 0.477311348 | 0.037793798 |
| STEAP2     | 0.477276421 | 0.037228906 |
| DDX60      | 0.477211998 | 0.009078471 |
| ADCK3      | 0.477123007 | 0.020862518 |
| TOX        | 0.476948413 | 0.032617717 |
| PHF15      | 0.476167087 | 0.013982606 |
| CALHM2     | 0.476091341 | 0.016356455 |
| PROS1      | 0.47595368  | 0.045650034 |
| GYPC       | 0.475744149 | 0.008622065 |
| SRGAP1     | 0.475403908 | 0.003901555 |
| CDC14B     | 0.474262706 | 0.020210325 |
| LBX2       | 0.472035523 | 0.007194025 |
| ARHGEF3    | 0.470722358 | 0.037833846 |
| LNP1       | 0.469392725 | 0.00095991  |
| TWIST1     | 0.465353159 | 0.037330356 |
| PTCH2      | 0.465090843 | 0.0007951   |
| PDE4B      | 0.46489846  | 0.03812972  |
| TRPS1      | 0.464692802 | 0.001414993 |
| TESK2      | 0.464438446 | 0.019173379 |
| CTSL1      | 0.463502574 | 0.012839839 |
| CEP19      | 0.4625238   | 0.003406282 |
| PARP14     | 0.46129138  | 0.013727504 |
| IFI16      | 0.461099168 | 2.6121E-07  |
| TSHZ1      | 0.460504196 | 0.009061916 |
| FAM20C     | 0.457964664 | 0.023947517 |
| BF1        | 0.457531492 | 0.023404372 |
| OSBP2      | 0.456669683 | 0.040503724 |
| RFX2       | 0.45623122  | 0.013911385 |
| KLF3       | 0.455376833 | 0.002734862 |
| FLT3LG     | 0.454988479 | 0.006203819 |
| HECA       | 0.453911947 | 0.003671219 |
| HST3HG2A   | 0.453647362 | 0.025637205 |
| SYNE3      | 0.45309849  | 0.013727504 |
| SPATA6     | 0.451275607 | 0.007316678 |
| MMD        | 0.450899689 | 0.008845265 |
| HCF11R1    | 0.449231271 | 0.038092651 |
| PLN2       | 0.447150255 | 0.007948589 |
| TAF4B      | 0.446798344 | 0.007025273 |

|            |             |             |
|------------|-------------|-------------|
| SLC25A23   | 0.446376607 | 0.017439139 |
| ATFS       | 0.446181741 | 0.004568533 |
| SVIL       | 0.445449712 | 0.013342546 |
| PRDM8      | 0.444646714 | 0.006003377 |
| TRIM2      | 0.444030452 | 0.009073863 |
| CBX7       | 0.439711281 | 0.014333882 |
| OAF        | 0.439214893 | 0.033827895 |
| GLTSCR2    | 0.437042616 | 0.005583015 |
| ADAMTS5    | 0.436355995 | 0.042261253 |
| RAB3L1     | 0.436177282 | 0.021488212 |
| TNFSF13B   | 0.43617558  | 0.045290999 |
| UBE2L6     | 0.435481731 | 0.000792932 |
| NIM        | 0.434203775 | 0.000843932 |
| PLD1       | 0.434147554 | 0.019173379 |
| FAM167B    | 0.433274704 | 0.017547663 |
| GUCY1B3    | 0.433045587 | 0.029663336 |
| SPSB1      | 0.432846584 | 0.000421755 |
| PLSCR1     | 0.430741977 | 0.002939887 |
| MGST1      | 0.430629963 | 0.007641545 |
| PATL2      | 0.430544613 | 0.024028094 |
| ADM        | 0.430539291 | 0.019140863 |
| DTX3L      | 0.429442451 | 0.002730486 |
| IGLRL1     | 0.429307676 | 0.017154913 |
| PCDHGC3    | 0.42841907  | 0.004115288 |
| FAM110B    | 0.425771977 | 0.047248795 |
| ADHFE1     | 0.425759565 | 0.009068835 |
| FES        | 0.424821698 | 0.002504546 |
| HRH1       | 0.424733144 | 0.009107133 |
| NLGN3      | 0.423724472 | 0.025643429 |
| STEAP1     | 0.422973369 | 0.023679324 |
| ZNF436     | 0.422103579 | 0.007314484 |
| TBX15      | 0.420889775 | 0.016213706 |
| MESP2      | 0.420432909 | 0.039996433 |
| MAAML3     | 0.420245559 | 0.019454959 |
| C14orf132  | 0.419810859 | 0.02479879  |
| FYN        | 0.419001588 | 0.00089455  |
| PRTFDC1    | 0.418832806 | 3.07189E-05 |
| EFCAB4A    | 0.417752726 | 0.012205159 |
| SMO4       | 0.417661099 | 0.000177718 |
| VIVCE      | 0.415460931 | 0.011107489 |
| NM1        | 0.416413077 | 0.049245129 |
| FAXC       | 0.415804928 | 0.000679659 |
| PCOLCE2    | 0.41536827  | 0.040503724 |
| BOC        | 0.415297035 | 0.008858736 |
| SCN11A     | 0.413978604 | 0.04879583  |
| FR1        | 0.413823154 | 0.01585935  |
| USP51      | 0.413406639 | 0.006925019 |
| PARP9      | 0.411069794 | 0.007194025 |
| GLUL       | 0.410234222 | 0.000101997 |
| BEND6      | 0.409492204 | 5.50682E-07 |
| ANAGR      | 0.407876989 | 0.033868943 |
| GL3        | 0.405884016 | 0.016239501 |
| EIF4EBP3   | 0.405127314 | 0.007978847 |
| DPYD       | 0.404641115 | 0.007537637 |
| SLC9A3R1   | 0.404548893 | 0.041091318 |
| PTGFRN     | 0.40415836  | 0.024769654 |
| SFPA12     | 0.403734527 | 0.03582071  |
| OMD        | 0.402698828 | 0.041875597 |
| CYBRD1     | 0.402314874 | 0.020232375 |
| IGFBP3     | 0.402267258 | 0.028642655 |
| MOXD1      | 0.402031666 | 0.016213706 |
| PTH1H      | 0.401724981 | 0.033020861 |
| C10orf10   | 0.401320369 | 0.031197461 |
| ZNF395     | 0.399297184 | 0.014587987 |
| CCDC151    | 0.398144021 | 0.002557554 |
| SBSN       | 0.39772757  | 0.04228002  |
| TNFRSF6B   | 0.397695209 | 0.008729121 |
| IDK        | 0.397207493 | 0.007177396 |
| PYCARD     | 0.396285621 | 0.005049291 |
| ABC6       | 0.394881325 | 0.046878113 |
| TMEM140    | 0.394246236 | 0.002785906 |
| TRPV3      | 0.394059973 | 0.019824389 |
| STEAP4     | 0.393353586 | 0.034021535 |
| OAS3       | 0.392845858 | 0.036172639 |
| C8orf46    | 0.392053655 | 0.038871113 |
| PROCR      | 0.391818267 | 0.009657184 |
| GCHFR      | 0.391193018 | 0.024769854 |
| PTPN22     | 0.39117508  | 0.028728179 |
| CFM        | 0.39067659  | 0.045538901 |
| A4GALT     | 0.390579773 | 0.024680084 |
| KIAA0930   | 0.390337709 | 0.004395396 |
| LRRK2      | 0.38922142  | 0.007526967 |
| CASP1      | 0.388384435 | 0.016239501 |
| SLC14A3    | 0.388327219 | 0.014177366 |
| TRAF3IP2   | 0.38735188  | 0.002258344 |
| C5orf4     | 0.387317293 | 0.028854398 |
| C16orf89   | 0.386738813 | 0.045199669 |
| PLEKHB1    | 0.384817974 | 0.038622285 |
| LGALS3     | 0.384546848 | 0.000693949 |
| LTRN4      | 0.384301614 | 0.000724116 |
| IL15RA     | 0.383571386 | 0.03705712  |
| RASL11A    | 0.381984061 | 0.032000142 |
| IL18R1     | 0.381366359 | 0.047120977 |
| PTGIS      | 0.38075108  | 0.019012374 |
| FAM149A    | 0.380676639 | 0.026742837 |
| IL1R2      | 0.379765632 | 0.03397637  |
| ROM1       | 0.378457417 | 0.008045496 |
| HSPB7      | 0.377790271 | 0.040187157 |
| CMYA5      | 0.377498454 | 0.008020113 |
| ZNF483     | 0.37729877  | 0.019170815 |
| APOL6      | 0.377203734 | 0.009407419 |
| PBX1       | 0.375519249 | 0.027284843 |
| PHYHD1     | 0.375079807 | 0.019982324 |
| RAB42      | 0.375000875 | 0.008695643 |
| IFIT2      | 0.374927374 | 0.011901419 |
| CXCL12     | 0.37354258  | 0.019824389 |
| DDO        | 0.373469266 | 0.014333882 |
| AQPPEP     | 0.372432437 | 0.019329198 |
| OLFML2A    | 0.371227238 | 0.042077171 |
| NAMPT      | 0.371085325 | 2.94346E-05 |
| CAPG       | 0.370969341 | 0.009369239 |
| FBLN1      | 0.36959161  | 0.021403601 |
| KIAA0228L  | 0.369351956 | 0.04188666  |
| NANOS1     | 0.369001803 | 0.04655511  |
| IFIT1      | 0.367501607 | 0.002580536 |
| TM6P4      | 0.367423352 | 0.007193444 |
| FAM102B    | 0.366907361 | 0.00969537  |
| SLC7A8     | 0.366125898 | 0.04860913  |
| IL4I1      | 0.366053059 | 0.04228002  |
| KCNQ3      | 0.365840122 | 0.04523778  |
| EFNA1      | 0.364660255 | 0.04974951  |
| DEIND3     | 0.363673686 | 0.025827318 |
| A3K2       | 0.363330278 | 0.002863378 |
| CSGALNACT1 | 0.363330009 | 0.02744241  |
| ALDH3A2    | 0.362248283 | 0.001134676 |
| GSTM1      | 0.362167367 | 0.037355315 |
| PPL        | 0.361685025 | 0.044560034 |
| OPMB       | 0.360649637 | 0.019765045 |
| TGFBF3     | 0.359108329 | 0.007786562 |

|           |             |             |
|-----------|-------------|-------------|
| CD79B     | 0.358238506 | 0.017306326 |
| PD3E3B    | 0.357773015 | 0.025323203 |
| ZDHC14    | 0.357768373 | 0.012106512 |
| OGN       | 0.357578682 | 0.028277444 |
| SGCA      | 0.357359043 | 0.046878113 |
| CTSS      | 0.35681198  | 0.030467952 |
| RPK3      | 0.355499847 | 0.026930995 |
| FI35      | 0.355606851 | 0.000136724 |
| IGJ       | 0.35562392  | 0.042076642 |
| MSX1      | 0.355212145 | 0.000328865 |
| RTNARL2   | 0.354487838 | 0.030435217 |
| SEPP1     | 0.353332074 | 0.042140891 |
| TSZH2     | 0.352928107 | 0.043657686 |
| SCN1B     | 0.352781227 | 0.00069702  |
| FKYD1     | 0.352659518 | 0.041540888 |
| RPS6KA5   | 0.351718708 | 0.002831549 |
| BATF      | 0.351427485 | 0.034981196 |
| IFT1B     | 0.351088033 | 0.02666742  |
| ZMYND12   | 0.350979573 | 0.02982518  |
| DNM1      | 0.350192847 | 0.019875103 |
| F10       | 0.350065441 | 0.014223292 |
| CSDC2     | 0.348484203 | 0.01994137  |
| STAC2     | 0.348103541 | 0.034701976 |
| C1QL3     | 0.34493933  | 0.03852168  |
| HTRA3     | 0.343755926 | 0.024019414 |
| AKR1C3    | 0.34385915  | 0.00984342  |
| PRELP     | 0.343270494 | 0.032617717 |
| MA        | 0.34228284  | 0.036243655 |
| REVL      | 0.341367396 | 0.030440293 |
| ALDH1A1   | 0.340977057 | 0.028467642 |
| FOXF1     | 0.34077795  | 0.03302264  |
| GPR88     | 0.339729121 | 0.032290427 |
| TMEM100   | 0.339140804 | 0.026594681 |
| GALNT9    | 0.338257757 | 0.017754204 |
| CAPS      | 0.337767459 | 0.01051073  |
| RGMA      | 0.337545423 | 0.03242571  |
| FOXF2     | 0.33747794  | 0.010386738 |
| NABP2L1   | 0.336984207 | 0.005335596 |
| STMN3     | 0.336927295 | 0.032270527 |
| ZNRF2     | 0.335842199 | 0.00413537  |
| ZFP3L2    | 0.335898305 | 0.005657736 |
| RTNARL1   | 0.335770633 | 0.03290312  |
| PKDCC     | 0.335473709 | 0.011683037 |
| SIX1      | 0.334851974 | 0.003126073 |
| MYBP1     | 0.334143173 | 0.031802683 |
| FRG2      | 0.333151517 | 0.030854319 |
| RAET1E    | 0.332963675 | 0.023280044 |
| DCN       | 0.332334546 | 0.026930995 |
| THBS4     | 0.332224775 | 0.015703833 |
| CHDH      | 0.332110805 | 0.023404372 |
| GIPX      | 0.331803344 | 0.023250794 |
| CDHR3     | 0.331637049 | 0.0290069   |
| KCNJ2     | 0.330441289 | 0.020862518 |
| DCHS1     | 0.330307972 | 0.021539367 |
| MLXIP1    | 0.329708676 | 0.030020478 |
| ADP1      | 0.329492969 | 0.021040889 |
| POPDC1    | 0.32873616  | 0.01509782  |
| SPTLC3    | 0.328486544 | 0.002374199 |
| WISP2     | 0.328234325 | 0.028029975 |
| GALNT15   | 0.328116773 | 0.024916752 |
| TRIM7     | 0.327865071 | 0.005670331 |
| GLYT1L2   | 0.327389284 | 0.003126073 |
| MAMSTR    | 0.327363564 | 0.001088798 |
| ZNF385B   | 0.327036223 | 0.017420078 |
| EPST11    | 0.326509177 | 0.002366819 |
| CDH23     | 0.325140556 | 0.025991603 |
| RHOJ      | 0.324418133 | 0.024916752 |
| COL9A2    | 0.323471378 | 0.007978847 |
| RPS6KA2   | 0.32240338  | 8.00407E-05 |
| ERG       | 0.321062757 | 0.016364949 |
| CH25H     | 0.320792244 | 0.025520809 |
| ABCC2     | 0.319873601 | 0.000333273 |
| P2RX7     | 0.319615179 | 0.020813215 |
| CITA      | 0.318841571 | 0.013834796 |
| MBOAT1    | 0.31831078  | 0.001532049 |
| ITPR1L1   | 0.31796247  | 0.004838488 |
| PLIN1     | 0.317494098 | 0.007290803 |
| IGSF5     | 0.317281524 | 0.016364565 |
| HHPL2     | 0.316858044 | 0.02082518  |
| SNX9      | 0.314405516 | 2.66146E-06 |
| AHNAK2    | 0.312882059 | 0.014913136 |
| THEM5     | 0.312320945 | 0.018458109 |
| HPN       | 0.311883313 | 0.021447348 |
| FBXO2     | 0.311558937 | 0.002258344 |
| ADORA1    | 0.308206669 | 0.010674585 |
| OLFM2     | 0.30799107  | 0.009352089 |
| TMEM26    | 0.307550944 | 0.003348764 |
| ALDH1A2   | 0.3061619   | 0.011688889 |
| DUOX1     | 0.305177781 | 0.011422072 |
| UCP2      | 0.305161078 | 0.01334582  |
| TSKAN32   | 0.304937259 | 0.018775457 |
| TXNIP     | 0.303980847 | 0.018943325 |
| ETS2      | 0.303112484 | 0.000350192 |
| GMAP2     | 0.302904629 | 0.016662915 |
| MFZ       | 0.302753277 | 0.005917804 |
| HYAL1     | 0.302636804 | 0.006137763 |
| HECW1     | 0.302566204 | 0.008380374 |
| CLDN23    | 0.302102308 | 0.01776808  |
| GSC       | 0.301317286 | 0.013558287 |
| DUOX1     | 0.300933043 | 0.000962826 |
| LNX1      | 0.298793866 | 0.0006937   |
| PLCD3     | 0.296969504 | 0.00049872  |
| SLC39A2   | 0.296089128 | 0.014228852 |
| PEX5L     | 0.293385836 | 0.007110294 |
| PN3       | 0.293076471 | 0.0028817   |
| AKR1C4    | 0.291971889 | 0.003194576 |
| SCARA5    | 0.29144015  | 0.003452094 |
| CLIC2     | 0.290507857 | 0.005324814 |
| OTOF      | 0.290253935 | 0.013103813 |
| OLFM1     | 0.289940474 | 0.005696209 |
| PKA       | 0.289916703 | 0.012067353 |
| FMX2      | 0.28978394  | 0.013166906 |
| TMEM30B   | 0.288902779 | 0.012726451 |
| ADH4      | 0.28858492  | 0.011688889 |
| COL9A3    | 0.288446177 | 0.011688889 |
| WNT9A     | 0.288051501 | 0.013219168 |
| IFT3      | 0.286992955 | 0.00051411  |
| TLRS      | 0.286508984 | 0.006452655 |
| SLCO4A1   | 0.28598204  | 0.011688889 |
| PHEX      | 0.285001722 | 0.008380374 |
| AIM1      | 0.284810029 | 6.3775E-05  |
| RTN4      | 0.283883527 | 0.005016307 |
| NRR1      | 0.2830396   | 0.011937042 |
| F3        | 0.282723297 | 0.011852281 |
| SUPT20HL1 | 0.281311479 | 0.011449885 |
| ASPA      | 0.280099181 | 0.009265576 |
| TSKAN11   | 0.279384849 | 0.009657184 |
| TGAL7     | 0.279303029 | 0.003901655 |
| VWASA     | 0.278893525 | 0.001532049 |



|           |             |             |
|-----------|-------------|-------------|
| MAPK10    | 0.278459988 | 0.003170282 |
| SYT7      | 0.216252287 | 8.20159E-09 |
| LOC402160 | 0.27375233  | 0.008622065 |
| CLGN      | 0.272735638 | 0.008467928 |
| GCH1      | 0.272041383 | 0.001298711 |
| CEBPA     | 0.271967666 | 0.008974438 |
| SECTM1    | 0.271931008 | 0.008158149 |
| IFIT2     | 0.26962939  | 0.008196278 |
| IL1R1     | 0.268263354 | 0.001187426 |
| CACNA1G   | 0.267875132 | 0.006467294 |
| TBC1D8    | 0.267580205 | 0.001790433 |
| SCG5      | 0.266115887 | 0.002688538 |
| MITF      | 0.262210968 | 0.002684046 |
| HTRA4     | 0.260908449 | 0.004488767 |
| HOXA13    | 0.260762121 | 0.004323463 |
| GSDMC     | 0.260063259 | 0.005940886 |
| LRRTM2    | 0.259661298 | 0.002512509 |
| MAF       | 0.259660615 | 0.003376701 |
| SLC9A9    | 0.258574241 | 0.00962626  |
| GSTM5     | 0.257686005 | 0.001767686 |
| SLC47A2   | 0.257303041 | 0.004982695 |
| CH3L1     | 0.254766903 | 0.003584755 |
| TWIST2    | 0.25382707  | 0.000167326 |
| LG2       | 0.253731538 | 0.005036862 |
| GLDN      | 0.249899711 | 0.003270527 |
| RAI2      | 0.244288436 | 0.00417146  |
| SHOX2     | 0.244219019 | 0.003477728 |
| CD34      | 0.244188526 | 0.002334589 |
| TNFSF10   | 0.242622681 | 0.003486006 |
| THBD      | 0.241160215 | 0.00377097  |
| PLXDC1    | 0.239943333 | 0.000529335 |
| MYRIP     | 0.239339774 | 0.003543935 |
| PTGER2    | 0.239136891 | 0.000401294 |
| IRAK3     | 0.238360544 | 0.001767686 |
| KYNU      | 0.23835569  | 0.003168841 |
| SNED1     | 0.23459717  | 0.000581515 |
| SLC2A12   | 0.231979282 | 0.000926459 |
| CAMK2B    | 0.230867689 | 0.002767446 |
| METTL7A   | 0.230515962 | 0.001481079 |
| STR3A1    | 0.230389384 | 0.000726677 |
| CLP       | 0.230274281 | 0.000927425 |
| PHKG1     | 0.229065902 | 0.00053317  |
| APOL3     | 0.227544644 | 0.000843932 |
| SLC1A2    | 0.226563783 | 0.001348896 |
| AKR1C2    | 0.225703973 | 0.00076067  |
| MBNL3     | 0.219961715 | 0.000186054 |
| ADAMTS8   | 0.21966824  | 0.001717796 |
| PI16      | 0.217686995 | 0.001717796 |
| MSX2      | 0.214723706 | 0.000323967 |
| DUOX2     | 0.213743858 | 0.000305295 |
| OAS1      | 0.213711253 | 0.001259913 |
| FGF18     | 0.212198766 | 0.001414593 |
| ABCC9     | 0.211247521 | 0.000107148 |
| LRRN4CL   | 0.209951665 | 0.001021656 |
| FAM134B   | 0.208070756 | 0.000320244 |
| ANO2      | 0.207435875 | 0.001014833 |
| PCDH12    | 0.20575197  | 0.002026567 |
| FBP1      | 0.204252398 | 0.000926459 |
| S100A4    | 0.204115657 | 0.000961722 |
| AKR1C1    | 0.203439578 | 0.000320244 |
| RARRES3   | 0.201893962 | 0.000107148 |
| TNFSF15   | 0.201469914 | 0.000724116 |
| ACSS1     | 0.20101547  | 8.96368E-05 |
| FAM55C    | 0.20092434  | 0.000101997 |
| ALDH3A1   | 0.199292317 | 0.00071906  |
| SOD2      | 0.194338863 | 2.53968E-05 |
| BEGAN     | 0.194138136 | 0.000633111 |
| KCNB1     | 0.189721924 | 0.000505151 |
| DENND2A   | 0.188674043 | 0.000305295 |
| MYOC      | 0.187149157 | 0.000529335 |
| MAB2L2    | 0.185636902 | 0.000180375 |
| FGL2      | 0.185409746 | 0.000506338 |
| BDNRB2    | 0.183375073 | 0.000109757 |
| FGF13     | 0.181897132 | 0.000250557 |
| FER1L6    | 0.181598528 | 0.000383215 |
| ARMC4     | 0.180835086 | 5.16464E-05 |
| ISM1      | 0.179721956 | 0.0002087   |
| DLX4      | 0.177812899 | 0.000332194 |
| TNXB      | 0.177448578 | 0.000167326 |
| CP        | 0.177469841 | 0.000166763 |
| FBLN2     | 0.177444237 | 0.000215369 |
| EMILIN2   | 0.177119829 | 0.000109757 |
| ARC       | 0.175793654 | 0.000106294 |
| CA2       | 0.174963894 | 0.000263825 |
| TNNT1     | 0.168707235 | 0.000191311 |
| SOX5      | 0.167232003 | 0.000177718 |
| ANGPTL5   | 0.160804146 | 0.000125231 |
| NTNG1     | 0.148016596 | 1.02159E-05 |
| CYP19A1   | 0.146993033 | 4.03866E-05 |
| ZNF385D   | 0.141612161 | 2.599E-05   |
| CLU       | 0.130003759 | 1.71091E-07 |
| ZNF521    | 0.12827054  | 4.24494E-06 |
| WNT11     | 0.127205036 | 6.34714E-06 |
| CYP24A1   | 0.1242666   | 6.57183E-06 |
| TKS       | 0.11737564  | 2.07651E-06 |
| CH3L2     | 0.113782334 | 1.66742E-06 |
| TNFAIP6   | 0.107814396 | 3.51608E-09 |
| BAI1      | 0.107281251 | 3.84838E-07 |
| PLA2G2A   | 0.096397049 | 1.34371E-07 |
| NTN1      | 0.094073932 | 1.06682E-07 |
| HAND2     | 0.089011873 | 1.84062E-08 |
| IGSF8B    | 0.088754944 | 5.10289E-08 |
| HPD       | 0.079900598 | 8.84438E-09 |
| ADH1A     | 0.072635577 | 1.62914E-10 |
| ADH1C     | 0.052706683 | 1.29751E-12 |
| CCRL1     | 0.032698453 | 2.48959E-18 |

Table S4

| List of genes related to Osteogenesis (GSEA) |
|----------------------------------------------|
| ACVR1                                        |
| AHSG                                         |
| ALPL                                         |
| ANXA5                                        |
| BGLAP                                        |
| BGN                                          |
| BMP1                                         |
| BMP2                                         |
| BMP3                                         |
| BMP4                                         |
| BMP5                                         |
| BMP6                                         |
| BMP7                                         |
| BMPR1A                                       |
| BMPR1B                                       |
| BMPR2                                        |
| CALCR                                        |
| CD36                                         |
| CDH11                                        |
| CHRD                                         |
| COL10A1                                      |
| COL14A1                                      |
| COL15A1                                      |
| COL1A1                                       |
| COL1A2                                       |
| COL2A1                                       |
| COL3A1                                       |
| COL5A1                                       |
| COMP                                         |
| CSF1                                         |
| CSF2                                         |
| CSF3                                         |
| CTSK                                         |
| DLX5                                         |
| EGF                                          |
| EGFR                                         |
| FGF1                                         |
| FGF2                                         |
| FGFR1                                        |
| FGFR2                                        |
| FLT1                                         |
| FN1                                          |
| GDF10                                        |
| GLI1                                         |
| ICAM1                                        |
| IGF1                                         |
| IGF1R                                        |
| IGF2                                         |
| IHH                                          |
| ITGA1                                        |
| ITGA2                                        |
| ITGA3                                        |
| ITGAM                                        |
| ITGB1                                        |
| MMP10                                        |
| MMP2                                         |
| MMP8                                         |
| MMP9                                         |
| NFKB1                                        |
| NOG                                          |
| Osteogenesis                                 |
| PDGFA                                        |
| PHEX                                         |
| RUNX2                                        |
| SERPINH1                                     |
| SMAD1                                        |
| SMAD2                                        |
| SMAD3                                        |
| SMAD4                                        |
| SMAD5                                        |
| SOX9                                         |
| SP7                                          |
| SPP1                                         |
| TGFB1                                        |
| TGFB2                                        |
| TGFB3                                        |
| TGFBR1                                       |
| TGFBR2                                       |
| TNF                                          |
| TNFSF11                                      |
| TWIST1                                       |
| VCAM1                                        |
| VDR                                          |
| VEGFA                                        |
| VEGFB                                        |

Table S5

## List of genes related to Cellular Senescence (GSEA)

ABL1  
AKT1  
ALDH1A3  
ALR  
ATM  
BMI1  
CCNA2  
CCNB1  
CCND1  
CCNE1  
CD44  
CDC25C  
CDK2  
CDK4  
CDK6  
CDKN1A  
CDKN1B  
CDKN1C  
CDKN2A  
CDKN2B  
CDKN2C  
CDKN2D  
CHEK1  
CHEK2  
CITED2  
COL1A1  
COL3A1  
CREG1  
E2F1  
E2F3  
EGR1  
ETS1  
ETS2  
FN1  
GADD45A  
GLB1  
GSK3B  
HRAS  
ID1  
IFNG  
IGF1  
IGF1R  
IGFBP3  
IGFBP5  
IGFBP7  
ING1  
IRF3  
IRF5  
IRF7  
MAP2K1  
MAP2K3  
MAP2K6  
MAPK14  
MDM2  
MORC3  
MYC  
NBN  
NFKB1  
NOX4  
PCNA  
PIK3CA  
PLAU  
PRKCD  
PTEN  
RB1  
RBL1  
RBL2  
SERPINB2  
SERPINE1  
SIRT1  
SOD1  
SOD2  
SPARC  
TBX2  
TBX3  
TERF2  
TERT  
TGFB1  
TGFB11  
THBS1  
TP53  
TP53BP1  
TWIST1  
VIM

Table S6

| List of the 112 genes<br>differentially expressed in all<br>three myeloid subentities |
|---------------------------------------------------------------------------------------|
| <i>ABCC9</i>                                                                          |
| <i>ACSS1</i>                                                                          |
| <i>ADH1A</i>                                                                          |
| <i>ADH1C</i>                                                                          |
| <i>AIM1</i>                                                                           |
| <i>AKR1C1</i>                                                                         |
| <i>ALDH3A1</i>                                                                        |
| <i>ANGPTL5</i>                                                                        |
| <i>ANO2</i>                                                                           |
| <i>APOL3</i>                                                                          |
| <i>ARC</i>                                                                            |
| <i>ARMC4</i>                                                                          |
| <i>ARSE</i>                                                                           |
| <i>BAI1</i>                                                                           |
| <i>BDKRB2</i>                                                                         |
| <i>BEGAIN</i>                                                                         |
| <i>BEND6</i>                                                                          |
| <i>CA2</i>                                                                            |
| <i>CCNB1IP1</i>                                                                       |
| <i>CCRL1</i>                                                                          |
| <i>CHD7</i>                                                                           |
| <i>CHI3L2</i>                                                                         |
| <i>CLIC2</i>                                                                          |
| <i>CLU</i>                                                                            |
| <i>CSDA</i>                                                                           |
| <i>CYP19A1</i>                                                                        |
| <i>CYP24A1</i>                                                                        |
| <i>DENND2A</i>                                                                        |
| <i>DLX4</i>                                                                           |
| <i>DUOX2</i>                                                                          |
| <i>DYNC1I1</i>                                                                        |
| <i>EMILIN2</i>                                                                        |
| <i>EPHA2</i>                                                                          |
| <i>ERO1L</i>                                                                          |
| <i>ETS2</i>                                                                           |
| <i>FAM134B</i>                                                                        |
| <i>FAM65C</i>                                                                         |
| <i>FAXC</i>                                                                           |
| <i>FBLN2</i>                                                                          |
| <i>FBP1</i>                                                                           |
| <i>FER1L6</i>                                                                         |
| <i>FGL2</i>                                                                           |
| <i>FLNB</i>                                                                           |

FYN  
GLUL  
GSTM5  
HAND2  
HOXB2  
HOXB3  
HOXB4  
HOXB5  
HOXB6  
HOXB7  
HPD  
IFI16  
IFI35  
IGSF9B  
INHBB  
ISM1  
KCNB1  
LPPR2  
LRRN4CL  
LTBP4  
LYRM4  
MAMSTR  
MAN2A2  
MBNL3  
MEAF6  
MSX1  
MSX2  
MYOC  
NAMPT  
NTN1  
NTNG1  
P4HB  
PCDH12  
PHKG1  
PLA2G2A  
PLCD3  
PLOD3  
PRTFDC1  
PTGER2  
PVRL2  
QPCTL  
RARRES3  
REV3L  
RPL15  
RPL32  
RPS6KA2  
RPS8  
RPS9  
S100A4  
SCG5  
SIPA1L1  
SLC1A1  
SLC2A12  
SNX9  
SOD2  
SOX5  
SPSB1  
SRGN  
STAT4  
SYT7  
THBD  
TNFAIP6  
TNNT1  
TNXB  
TSKS  
TWIST2  
WNT11  
ZNF385D  
ZNF521

Table S7

| List of the 312 genes commonly deregulated in all three myeloid subentities and TGFβ1-treated healthy MSC |
|-----------------------------------------------------------------------------------------------------------|
| <i>CREB3L1</i>                                                                                            |
| <i>PTPLA</i>                                                                                              |
| <i>PFKP</i>                                                                                               |
| <i>PDCL3</i>                                                                                              |
| <i>TLN1</i>                                                                                               |
| <i>WISP2</i>                                                                                              |
| <i>NDUFS1</i>                                                                                             |
| <i>BAK1</i>                                                                                               |
| <i>RPS5</i>                                                                                               |
| <i>HOXA13</i>                                                                                             |
| <i>B4GALNT1</i>                                                                                           |
| <i>ITGA3</i>                                                                                              |
| <i>PAPSS2</i>                                                                                             |
| <i>RELT</i>                                                                                               |
| <i>GSS</i>                                                                                                |
| <i>SEL1L3</i>                                                                                             |
| <i>VWA5A</i>                                                                                              |
| <i>ISM1</i>                                                                                               |
| <i>GRB2</i>                                                                                               |
| <i>DNM1</i>                                                                                               |
| <i>RARRES3</i>                                                                                            |
| <i>PLIN2</i>                                                                                              |
| <i>PCBP4</i>                                                                                              |
| <i>ALCAM</i>                                                                                              |
| <i>A4GALT</i>                                                                                             |
| <i>CHST11</i>                                                                                             |
| <i>NPR1</i>                                                                                               |
| <i>SLC9A9</i>                                                                                             |
| <i>WDR19</i>                                                                                              |
| <i>LRRC8A</i>                                                                                             |
| <i>LRRK2</i>                                                                                              |
| <i>ZNF395</i>                                                                                             |
| <i>MAPK10</i>                                                                                             |
| <i>ATAD3B</i>                                                                                             |
| <i>UBE2L6</i>                                                                                             |
| <i>ANKLE2</i>                                                                                             |
| <i>RTN4RL1</i>                                                                                            |
| <i>ARID5A</i>                                                                                             |
| <i>C5orf4</i>                                                                                             |
| <i>IFI27</i>                                                                                              |
| <i>OLFML2A</i>                                                                                            |
| <i>TMEM140</i>                                                                                            |
| <i>PPL</i>                                                                                                |
| <i>CYP19A1</i>                                                                                            |
| <i>SLC17A9</i>                                                                                            |
| <i>TPT1</i>                                                                                               |
| <i>SVIL</i>                                                                                               |
| <i>OAS1</i>                                                                                               |
| <i>ZFP36</i>                                                                                              |
| <i>KIAA1161</i>                                                                                           |
| <i>GLDN</i>                                                                                               |
| <i>C5</i>                                                                                                 |
| <i>VWCE</i>                                                                                               |
| <i>TBC1D8</i>                                                                                             |
| <i>TSHZ1</i>                                                                                              |
| <i>CREB3</i>                                                                                              |
| <i>CASP1</i>                                                                                              |
| <i>SECTM1</i>                                                                                             |
| <i>ADH1C</i>                                                                                              |
| <i>TOX</i>                                                                                                |
| <i>SYT7</i>                                                                                               |
| <i>SURF4</i>                                                                                              |
| <i>RPL39</i>                                                                                              |
| <i>EPSTI1</i>                                                                                             |
| <i>SPRYD7</i>                                                                                             |
| <i>BCAR3</i>                                                                                              |
| <i>CDR2L</i>                                                                                              |

PROS1  
MFAP3L  
SPTLC3  
TMEM132A  
TPST2  
APOBEC3F  
PDK4  
LRRFIP1  
TRIM47  
DNAJB11  
ARHGDIB  
CDK18  
INPPL1  
PPP1R13L  
PCDH12  
GSC  
ASL  
UNC119B  
PTGER2  
SDSL  
DKK3  
RIPK3  
RAET1L  
ATP13A2  
YRDC  
PTPRF  
ABCA6  
FXR2  
CHI3L2  
SNX9  
DNPEP  
CSGALNACT1  
RPS3A  
DCBLD1  
SLC2A6  
SLC39A13  
AP1B1  
CTPS1  
CBX7  
MYOC  
PATL2  
ARSG  
C5orf30  
CEP19  
TNFRSF14  
NTNG1  
IRF2  
LRP12  
PHF15  
MBNL3  
SLC35C1  
VASP  
LRRN4CL  
FAM214B  
CCRL1  
EVA1A  
CCDC71L  
ADM  
IFIH1  
KLC2  
FXVD1  
RAB9A  
NEK9  
GNB1  
SBSN  
GSTM5  
PDCC1LG2  
SIAE  
CTSO  
IGFBP3  
CLEC11A  
DCN  
PRELP  
N4BP2L1

MLLT11  
DHX58  
FAM20C  
CASP4  
GSTM2  
PCOLCE2  
CYBRD1  
PARP9  
FAM101B  
MAP7D1  
IL1R1  
ARFGAP1  
NCLN  
C10orf32  
CACNA1G  
LETMD1  
PNP  
MAPK8IP1  
ZADH2  
IFIT3  
TSPAN11  
HECA  
FGL2  
APOBEC3D  
RASSF7  
PACSIN2  
SQRL  
DPYSL2  
MSN  
GNAI2  
URB1  
EPHA2  
ATP6V0B  
TMEM30B  
PLA2G2A  
FLT3LG  
GSTA4  
HBEGF  
PTHLH  
MROH8  
IFFO2  
TSGA10  
CCRN4L  
PARP14  
KIAA1549L  
ZFP36L2  
ZCCHC24  
IFIT2  
STEAP4  
PITX2  
ANXA6  
CTSS  
RPL7  
FBLN1  
CLDN23  
EFNA1  
CADPS  
DDX60  
RPL22  
KYN  
SPHK1  
SPATA6  
TNK2  
CAP1  
CAMLG  
ZNF546  
SEMA7A



SLC4A2  
DAPK2  
TRIM69  
NAPEPLD  
GALNT7  
TRERF1  
C10orf10  
GCHFR  
SUN2  
PLOD3  
DYNC2H1  
TNFRSF12A  
ATAD3A  
TXNIP  
SPATA7  
GPR88  
EIF4B  
PGM2  
RPL26  
IVNS1ABP  
PRDM8  
HPD  
EPHA3  
P4HA2  
FAM108C1  
SCARA5  
SGK223  
SMURF1  
TG  
SEPP1  
SLC2A12  
BRIP1  
UBL3  
PPME1  
HPCAL1  
IFIT1  
TNFSF13B  
TUBB6  
DOCK10  
RPS12  
PABPC4  
ARL14EP  
ULBP2  
KHDRBS3  
SLC16A3  
CELSR1  
TMEM116  
BTN3A3  
LDLRAD3

LRRC59  
ADH1A  
SLFN1  
METTL7A  
CEBPA  
PDE11A  
FMO2  
ZMYND12  
CAP2  
CREBRF  
MLEC  
REEP4  
RPL13A  
KIAA2013  
PKM  
MYRIP  
SCNN1A  
KCNB1  
NIM1  
PLEKHA4  
CHSY3  
TXNRD3  
PFN1  
SIX1  
FAM65C  
SPATA13  
VOPP1  
IL11  
RASL11A  
AKR1C3  
CTSZ  
WNT5B  
PEX5L  
SNED1  
LPAR1  
KIAA0754  
MAGED2  
PDIA4  
ADAMTS5  
EVA1C  
RBM43  
TRIM25  
SCG5  
PXK  
APOL3  
CD274  
CP  
SLC52A2  
TNFRSF10D  
GPC1  
EEF1G  
FAM49B  
PTGIS  
HAPLN1  
RNLS
