# Supplementary material for: Transforming growth factor β1-mediated functional inhibition of mesenchymal stromal cells in myelodysplastic syndromes and acute myeloid leukemia
Source: PubMed Central journal article supplement — Haematologica. 2018 May 17;103(9):1462–71. doi: 10.3324/haematol.2017.186734 (PMC6119130; doi:10.3324/haematol.2017.186734), 2018-09
Supplement: 2017_186734-Disclosures_and_Contributions.pdf [file 2017_186734-Disclosures_and_Contributions.pdf]

Haematologica  
HAEMATOL/2017/186734  
Version 3

TGF $\beta$ 1-mediated functional inhibition of mesenchymal stromal cells in  
myelodysplastic syndromes and acute myeloid leukemia

Stefanie Geyh, Manuel Rodríguez-Paredes, Paul Jäger, Annemarie  
Koch, Felix Bormann, Julian Gutekunst, Christoph Zilkens, Ulrich  
Germing, Guido Kobbe, Frank Lyko, Rainer Haas, and Thomas  
Schroeder

Disclosures: none

Contributions: Conception and Design: S. G., M. R. P., F. L., R. H., T. S. Provision of  
patients samples: P. J., C. Z., U. G., G. K., T. S. Experiments, Collection and assembly of  
data: all authors Data analysis and interpretation: S. G., M. R. P., F. L., R. H., T. S.  
Manuscript writing: S. G., M. R. P., F. L., R. H., T. S. Final approval of the manuscript: all  
authors
