# Supplementary material for: Transforming growth factor β1-mediated functional inhibition of mesenchymal stromal cells in myelodysplastic syndromes and acute myeloid leukemia
Source: PubMed Central journal article supplement — Haematologica. 2018 May 17;103(9):1462–71. doi: 10.3324/haematol.2017.186734 (PMC6119130; doi:10.3324/haematol.2017.186734), 2018-09
Supplement: HAEMATOL-2017-186734v3-Geyh-01.pdf [file HAEMATOL-2017-186734v3-Geyh-01.pdf]

# TGF $\beta$ -1 plays a suppressive role in the bone marrow microenvironment of patients with myelodysplastic syndromes and acute myeloid leukemia, and targeting TGF $\beta$ -1 is a promising treatment approach

## Healthy mesenchymal stromal cells (MSCs)

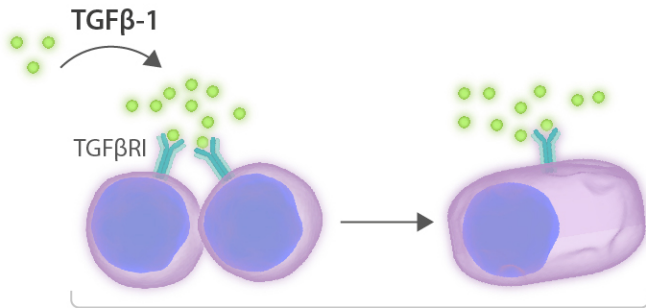

- ↓ Proliferation
- Similar phenotype of MDS- and AML-derived MSCs
- ↓ Osteogenic differentiation

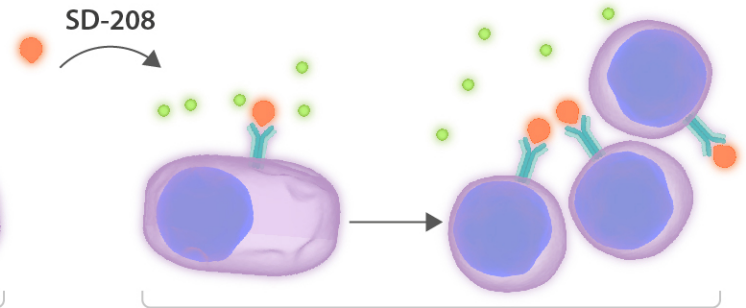

- ↑ Proliferation
- Phenotypic reversion
- Restoration of osteogenic differentiation capacity

## MDS- and AML-derived MSCs

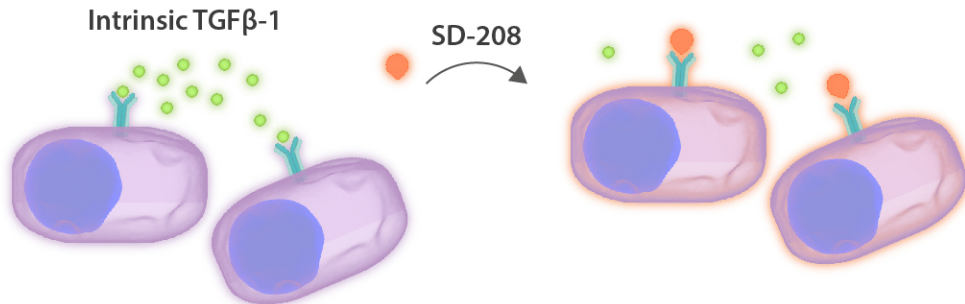

- Restoration of osteogenic differentiation capacity
